# Supplementary material
Source: PubMed Central journal article supplement (PMC6402752)
Supplement: pr5b01004_si_001.pdf [file pr5b01004_si_001.pdf]

## Supporting Information to:

### Expanding the Interactome of the Noncanonical NF- $\kappa$ B Signaling Pathway

Katharina L. Willmann<sup>1</sup>, Roberto Sacco<sup>1,§,#</sup>, Rui Martins<sup>1,2,#</sup>, Wojciech Garncarz<sup>1,#</sup>, Ana Krolo<sup>1</sup>, Sylvia Knapp<sup>1,2</sup>, Keiryn L. Bennett<sup>1</sup>, Kaan Boztug<sup>1,3,4\*</sup>

<sup>1</sup>CeMM Research Center for Molecular Medicine of the Austrian Academy of Sciences, 1090 Vienna, Austria; <sup>2</sup>Department of Medicine I, Laboratory of Infection Biology, Medical University of Vienna, 1090 Vienna, Austria; <sup>3</sup>Department of Paediatrics and Adolescent Medicine, Medical University of Vienna, 1090 Vienna, Austria; <sup>4</sup>Ludwig Boltzmann Institute for Rare and Undiagnosed Diseases and CeRUD Vienna Center for Rare and Undiagnosed Diseases, 1090 Vienna, Austria

<sup>§</sup>current address: Institute of Science and Technology Austria, 3400 Klosterneuburg, Austria;

<sup>#</sup>these authors contributed equally

\*Correspondence and requests for materials should be addressed to K.B. (email: kboztug@cemm.oeaw.ac.at or kaan.boztug@rud.lbg.ac.at; phone: +43-1-40160-70069).

#### Table of content:

|                                    |          |
|------------------------------------|----------|
| Figure S1                          | Page S-2 |
| Figure S2                          | Page S-3 |
| Figure S3                          | Page S-4 |
| Supplementary Material and Methods | Page S-5 |

**Figure S1**

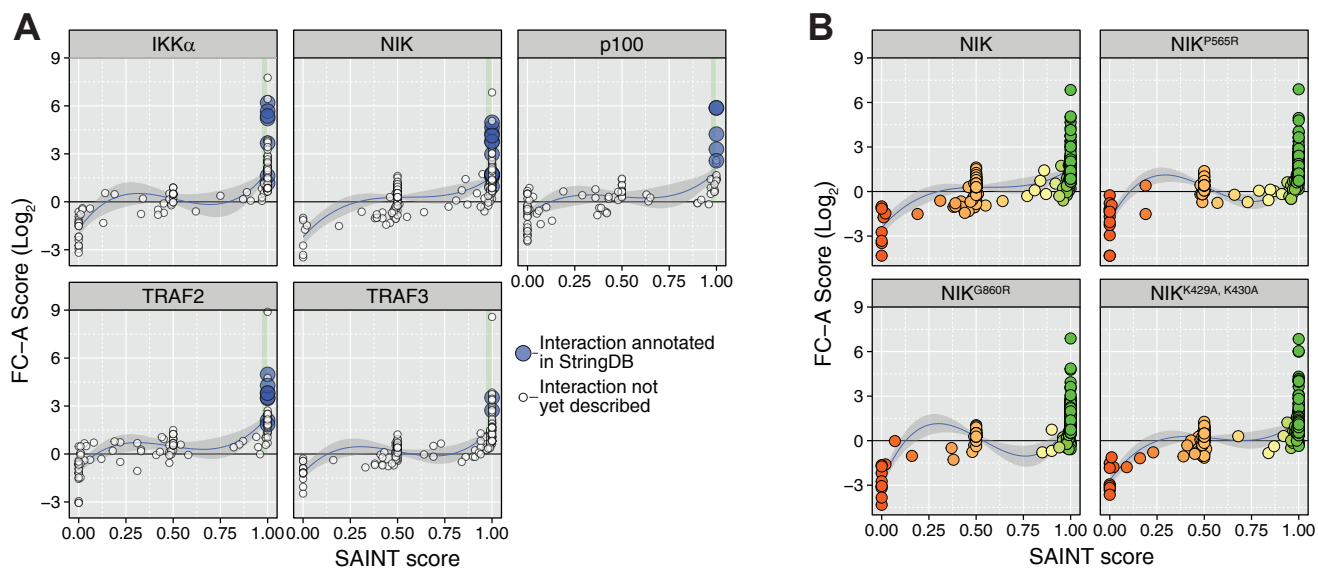

**Supplementary Figure 1.** Distribution of interactors of SH-tagged proteins plotted by SAINT and CRAPome FC-A score. The areas colored in green contain interactors with a SAINT threshold of 1 and a CRAPome score above 2.5. (A) Plots for SH-tagged proteins IKK $\alpha$ , NIK, NF- $\kappa$ B2/p100, TRAF2 and TRAF3. Blue dots depict interactions annotated in the STRING database (B) Plots for SH-tagged NIK variants NIK<sup>wt</sup>, NIK<sup>P565R</sup>, NIK<sup>G860R</sup>, NIK<sup>K429A, K430A</sup>

## Figure S2

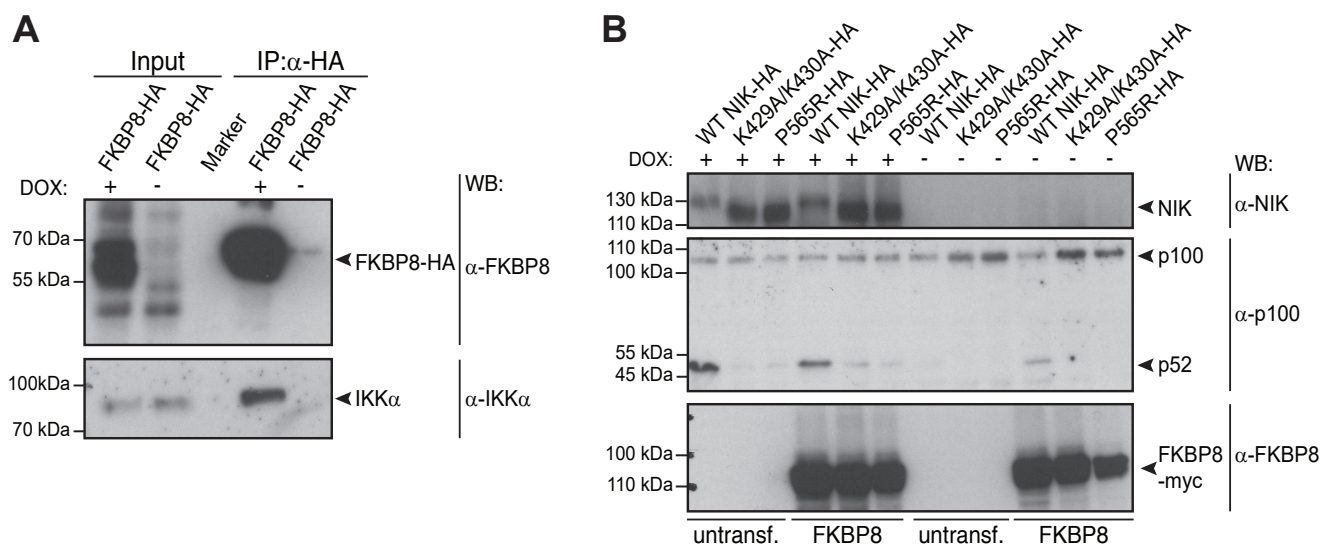

**Supplementary Figure 2.** The interactor FKBP8. (A) Co-IP using doxycycline-inducible cell lines HA-FKBP8. Uninduced samples were used as control. Immunoprecipitation with anti-HA agarose beads indicated an association of HA-FKBP8 with endogenous IKK $\alpha$ . (B) Co-expression of HA-NIK variants (by doxycyclin induction) and myc-tagged FKBP8 (by transient expression vector transfection) in HEK293 FlpIn lines. Unprocessed p100 and processed p52 was monitored in the presence or absence of NIK and FKBP8 overexpression by immunoblot of whole cell lysates. No differential p100 processing was observed when functional NIK was present together with FKBP8. This immunoblot represents an extended version of the blot in Figure 1B.

### Figure S3

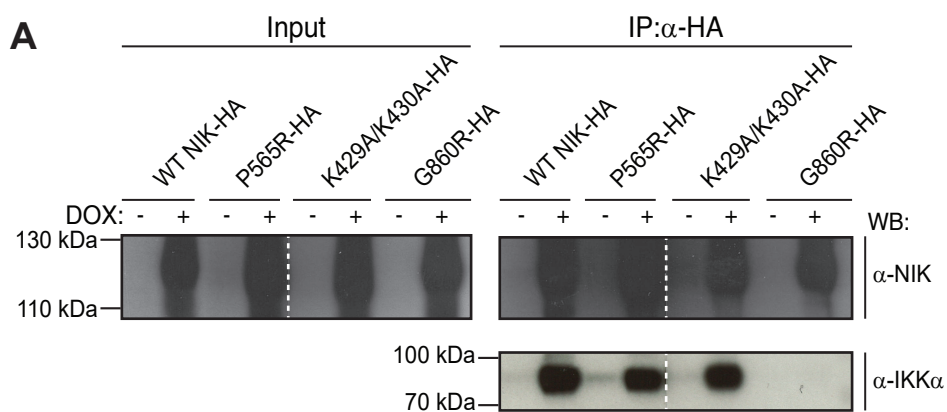

**Supplementary Figure 3.** Interaction of NIK variants with IKK $\alpha$ . (A) Co-IP using doxycycline-inducible cell lines HA-NIK and mutant variants of NIK. Uninduced samples were used as control. Immunoprecipitation with anti-HA agarose beads indicated an association of HA-NIK<sup>wt</sup>, NIK<sup>P565R</sup>, and NIK<sup>K429A,K430A</sup>, but not NIK<sup>G860R</sup> with endogenous IKK $\alpha$ .

## Supplementary Material and Methods

Sequences of the plasmid vectors used in this study:

pTO-SII-HA-GW (GFP N terminal)

gacggatcgggagatctcccgatcccctatggtgcactctcagtacaatctgctctgatgccgcatagttaagccagtatctgctccct  
gcttgtgttggaggtcgtgagtagtgcgcgagcaaaatctaagctacaacaaggcaaggctgaccgacaattgatgaagaat  
ctgcttagggtaggcgtttgcgctgcttcgcatgtacggccagatatacgcgttgacattgattattgactagtattataatagtaat  
caattacggggcatttagttcatagcccataatggagttccgcgttacataacttacggtaaatggcccgcctggctgaccgccc  
cgaccccccccattgacgtcaataatgacgtatgtcccatagtaacgcaatagggactttccattgacgtcaatgggtggagatt  
tacggtaactgccactggcagtacatcaagtgtatcatatgccagtagccccctattgacgtcaatgacgtaaatggcccgc  
ctggcattatgccagtagatgaccttatgggactttcctacttggcagtagatctacgtattatgctcgtattaccatgggtgatcgg  
ttttggcagtagatcaatgggctggatagcggttgactcacggggatttccaagtctccaccccattgacgtcaatgggagttgttt  
tggcaccaaaatcaacgggactttccaaaatgtcgtacaactccgccccattgacgcaaatgggcggtaggcgtgtacgggtggg  
aggtctatataagcagagctctccctatcagtgatagagatctccctatcagtgatagagatcgtcgcagagctcgtttagtgaacct  
cagatcgccctggagacgccatccacgctgtttgacctcatagaagacaccgggaccgatccagcctccggactctagcgtttaa  
acttaagcttggtagcagctcggatccactagtccagtgtggtggaattctgcagatatccagcacagtggcgccgctcgcagac  
catgtaccatacagatgttccctgactatgccggtaccgagctcggatccaccatggctagctggagccaccgcagttcgagaaa  
gtggaggttccggaggtggatcgggaggtggatcgtggagccaccgcagttcgaanaagcggccgatatacaagttgtacaa  
aaaagcagctccATGGTGAGCAAGGGCGAGGAGCTGTTCACCGGGGTGGTGCCCAT  
CCTGGTCGAGCTGGACGGCGACGTAAACGGCCACAAGTTCAGCGTGTCCGGCG  
AGGGCGAGGGCGATGCCACCTACGGCAAGCTGACCCTGAAGTTCATCTGCACC  
ACCGCAAGCTGCCCCTGCCCTGGCCACCCTCGTGACCACCCTGACCTACGGC  
GTGCAGTGCTTCAGCCGCTACCCCGACCACATGAAGCAGCACGACTTCTTCAA  
GTCCGCCATGCCCGAAGGCTACGTCCAGGAGCGCACCATCTTCTTCAAGGACG  
ACGGCAACTACAAGACCCGCGCCGAGGTGAAGTTCGAGGGCGACACCCTGGTG  
AACCGCATCGAGCTGAAGGGCATCGACTTCAAGGAGGACGGCAACATCCTGGG  
GCACAAGCTGGAGTACAACACTACAACAGCCACAACGTCTATATCATGGCCGACA  
AGCAGAAGAACGGCATCAAGGTGAACTTCAAGATCCGCCACAACATCGAGGA  
CGGCAGCGTGACGCTCGCCGACCACTACCAGCAGAACACCCCCATCGGCGACG  
GCCCCGTGCTGCTGCCCGACAACCACTACCTGAGCACCCAGTCCGCCCTGAGC  
AAAGACCCCAACGAGAAGCGCGATCACATGGTCCTGCTGGAGTTCGTGACCGC  
CGCCGGGATCACTCTCGGCATGGACGAGCTGTACAAGTAAaccagctttctgtacaaagt  
gtgacgtaagctaggggcccgtttaaaccgctgatcagcctcactgtgcttctagtgtccagccatctgtgtttgcccccccc  
gtgcttcttaccctggaaggtgccactcccactgtccttcttaataaaatgaggaaattgcatcgcattgtctgagtaggtgcat  
tctattctggggggtgggggtggggcaggacagcaagggggaggattgggaagacaatagcaggcatctgggggatcgggtgg  
gctctatggcttctgaggcggaaagaaccagctggggctctagggggtatccccacgcgcctgtagcggcgcattaagcgcgg  
cgggtgtggtgttacgcgcagcgtgaccgctacacttccagcgccttagcgcgccctcttcttcttcttcttcttctgccc  
acgttcgcccgttccccgtaagctctaaatcgggggctcccttaggggtccgatttagtgccttacggcacctcgcacccccaaa  
acttgattaggtgatggttacgtacctagaagttcctattccgaagttcctattctctagaaagtataggaactccttggccaaaa  
cctgaactcaccgcagctctgtcagaagttctgatcgaagttcgcagcgtctccgacctgatgcagctctcggagggcga  
agaatctcgtgctttagcttgcagcttgatgtagggggcgtggatgtcctcgggtaaatagctgcgccgatggttctacaaagatcgtt  
atgtttatcggcactttgcatcggccgcgctcccattccggaagtgttgacattggggaattcagcgagagcctgacctattgcat  
ctcccgcctgcacaggtgtcagttgcaagacctgcctgaaaccgaactgcccgtgttctgcagccggctcgcggaggccatg

gatgcgatcgtcggccgatcttagccagacgagcgggtcggccattcggaccgcaaggaatcggtaatacactacatggc  
gtgattcatatgcgcgattgctgatccccatgtgtactgcaaactgtgatggacgacaccgtcagtcgctccgctcgcgaggc  
tctcgatgagctgatgcttgggcccaggactgccccgaagtccggcacctcgtgcacgaggattcggctccaacaatgtctga  
cggacaatggccgcataacagcggctcattgactggagcggagcgtgtcgggattccaatacagaggtcggcaacatctcttc  
tggaggccgtggttggcttgtatggagcagcagcgcgtactcagcggaggtatccggagcttcaggatcggcgggtc  
cgggcgtatatgctccgattggtcttgaccaactctatcagagcttggttgacggcaatttcgatgatgcagcttgggcgcagggtc  
gatgcgacgcaatcgtccgatccggagccgggactgtcggcgctacacaaatcggccgagaagcggccgctcggaccgat  
ggctgtgtagaagtactcggcgaatgtgaaaccgacgccccagcactcgtccgagggcaaggaatagcacgtactacgagatt  
tcgattccaccgccccttctatgaaagggtgggctcggaaatcgttccgggacgcccgtggtgatcctccagcgggggatc  
tcatgctggagttctcggccaccaactgtttattgcagcttataatggttacaataaagcaatagcatcacaatttcacaataa  
agcatttttctactgcattctagttgtggttgcctcaactcatcaatgtatcttatcatgtctgtataccgtcagctctagctagagcttg  
gcgtaatcatggtcatagctgttctctgtgtaattgttatccgctcacaattccacacaacatacagccgggaagcataaagtgtaa  
agcctgggggtgcctaatgagtgagctaacacattaattgcgttgcgctcactgccgcttccagtcgggaaacctgtcgtgccag  
ctgcattaatgaatcggccaacgcgcggggagaggcgggttgcgtattgggcgctcttccgcttctcgtcactgactcgtcgc  
tcggctgctcggctcggcgagcgggtatcagctcactcaaaggcggtaatacgggtatccacagaatcaggggataacgcaggaa  
agaacatgtgagcaaaaggccagcaaaaggccaggaaccgtaaaaaggccgcttggctggcgttttccataggtcggcccc  
ctgacgagcatcacaataatgcagcgtcaagtcagaggtggcgaaccggacaggactataaagataaccaggcgttccccctgg  
aagctccctcgtgcgctcctctgttccgacctgccgctaccggatacctgtccgcttctccctcgggaagcgtggcgcttctc  
atagctcacgctgtaggtatctcagttcgggtgtaggtcgtcctcaagctgggtgtgtgcacgaacccccgttcagcccgacc  
gctgcgcttatccggtaactatcgtcttgagtccaaccggtaagacacgacttatcggcactggcagcagccactggtaacagga  
ttagcagagcggaggtatgtaggcggtctacagagttcttgaagtgggtgacctactacggctacactagaagaacagtatttggtat  
ctgcgctctgctgaagccagttacctcggaaaaagagttgtagctcttgatccggcaaaacaaccaccgctggtagcgggtggtttt  
ttgtttgcaagcagcagattacgcgcagaaaaaggatcctaagaatcctttgatctttctacggggctgacgctcagtgga  
cgaaaaactcacgtaagggatttggctcatgagattatcaaaaaggatcttcacctagatcctttaaataaaaatgaagtttaataca  
tctaaagtatatatgagtaaacttggctgacagttaccaatgcttaacagtgaggcacctatctcagcagatctgtctatttcgtcatcc  
atagttgctgactccccgctgctgtagataactacgatacgggagggcttaccatctgccccagtgctgcaatgataccgcgagac  
ccacgctcaccggctccagatttatcagcaataaccagccagccgggaaggccgagcgcagaagtggtcctgcaactttatccg  
cctccatccagcttataatgttccgggaagctagagtaagtagttccagttaatagtttgcgaacgttgttgcattgctacag  
gcatcgtggtgtcacgctcgtcgttgggtatggctcattcagctccggttcccaacgatcaaggcagttacatgatccccatgttgt  
gcaaaaaagcggtagctcttcggctcctccgatcgttgcagaagtaagttggccgagtggtatcactcatggttatggcagcact  
gcataattcttactgtcatgccatccgtaagatgctttctgtgactggtgagtactcaaccaagtcattctgagaatagtgatcgg  
cgaccgagttgctcttggccggcgtcaatacgggataataccgcgccacatagcagaactttaaagtctcatcattgaaaaact  
tcttggggcgaactctcaaggatctaccgctgttgagatccagttcgatgtaaccactcgtgcaccaactgatcttcagcatc  
tttactttcaccagcgttctgggtgagcaaaaacaggaaggcaaaatgccgcaaaaaagggaataagggcgacacggaaatgtt  
gaactcactcttcttttcaatattattgaagcatttatcagggtattgtctcatgagcggatacatattgaatgtatttagaaaaat  
aaacaaataggggttccgcgcacatttccccgaaaagtccacactgacgtc

pTO-SII-HA-GW (TRAF3 N terminal)

gacggatcgggagatctcccgatcccctatggtgcactctcagtaacaatctgctctgatgccgcatagttaagccagtatctgctccct  
gcttgtgtgtggaggtcgtgagtagtgcgcgagcaaaathtaagctacaacaaggcaaggcttgaccgacaattgcatgaagaat  
ctgcttagggtaggcgttttgcgctgcttcgcatgtacgggcccagatatacgcgttgacattgattattgactagttattaatagtaat  
caattacggggcattagttcatagcccataatgaggttccgcgttacataacttacggtaaatggcccgcctggctgaccgccc  
cgacccccgccattgacgtcaataatgacgtatgtcccatagtaacgccaatagggactttccattgacgtcaatgggtggagtatt  
tacggtaaatgccacttggcagtacatcaagtgtatcatatgccaaagtagcggccctattgacgtcaatgacggtaaatggcccgc  
ctggcattatgccagtagacattatgggactttcctacttggcagtagctacgtattatgctattaccatgggtgatcggg  
tttggcagtagatcaatggggcgtggatagcgggttactcaggggattccaagtctccaccccattgacgtcaatgggagttgttt  
tggcaccaaaatcaacgggactttccaaaatgtcgtacaactccgcccattgacgcaaatgggaggtaggcgtgtacgggtggg  
aggtctatataagcagagctctccctatcagtgatagagatctccctatcagtgatagagatcgtcgcagagctcgtttagtgaacct  
cagatcgcctggagacgccatccacgctgtttgacctcatagaagacaccgggaccgatccagcctccggactctagcgtttaa  
acttaagcttggtagcagctcggatccactagtcagtggtggaattctgcagatatccagcacagtgggcggccgctcagac  
catgtaccatacagatgttcccgaactacgcccgtaccgagctcggatccaccatggctagctggagccaccgcagttcagaaa  
gggtggaggttccggaggtggatcgggaggtggatcgtggagccaccgcagttcgaanaagcggccgatatacaagttgtac  
aaaaaagcaggtccATGGAGTCGAGTAAAAAGATGGACTCTCCTGGCGCGCTGCAGA  
CTAACCCGCCGCTAAAGCTGCACACTGACCGCAGTGCTGGGACGCCAGTTTTTG  
TCCCTGAACAAGGAGGTTACAAGGAAAAGTTTGTGAAGACCGTGGAGGACAA  
GTACAAGTGTGAGAAGTGCCACCTGGTGCTGTGCAGCCGAAGCAGACCGAGT  
GTGGGCACCGCTTCTGCGAGAGCTGCATGGCGGCCCTGCTGAGCTCTTCAAGTC  
CAAAATGTACAGCGTGTCAAGAGAGCATCGTTAAAGATAAGGTGTTTAAGGAT  
AATTGCTGCAAGAGAGAAATTCTGGCTCTTCAAGATCTATTGTTCGGAATGAAAG  
CAGAGGTTGTGCAGAGCAGTTAATGCTGGGACATCTGCTGGTGCATTTAAAAA  
ATGATTGCCATTTTGAAGAACTTCCATGTGTGCGTCCTGACTGCAAAGAAAAGG  
TCTTGAGGAAAGACCTGCGAGACCAGTGGAGAAGGCGTGTAATAACCGGGA  
AGCCACATGCAGCCACTGCAAGAGTCAGGTTCCGATGATCGCGCTGCAGAAAC  
ACGAAGACACCGACTGTCCCTGCGTGGTGGTGTCTGCCCCTACAAGTGCAGC  
GTCCAGACTCTCCTGAGGAGCGAGTTGAGTGCACACTTGTGAGAGTGTGTCAAT  
GCCCCAGCACCTGTAGTTTTAAGCGCTATGGCTGCGTTTTTCAGGGGACAAAC  
CAGCAGATCAAGGCCACGAGGCCAGCTCCGCCGTGCAGCACGTCAACCTGCT  
GAAGGAGTGGAGCAACTCGCTCGAAAAGAAGGTTTCTTGTGAGAATGAAA  
GTGTAGAAAAAACAAGAGCATAAAAGTTTGCACAATCAGATATGTAGCTTT  
GAAATTGAAATTGAGAGACAAAAGGAAATGCTTCGAAATAATGAATCCAAAAT  
CCTTCATTTACAGCGAGTGATAGACAGCCAAGCAGAGAACTGAAGGAGCTTG  
ACAAGGAGATCCGGCCCTTCCGGCAGAAGTGGAGGAAGCAGACAGCATGAA  
GAGCAGCGTGGAGTCCCTCCAGAACC GCGTGACCGAGCTGGAGAGCGTGGACA  
AGAGCGCGGGGCAAGTGGCTCGGAACACAGGCCTGCTGGAGTCCCAGCTGAGC  
CGGCATGACCAGATGCTGAGTGTGCACGACATCCGCCTAGCCGACATGGACCT  
GCGCTTCCAGGTCCTGGAGACCGCCAGCTACAATGGAGTGTCTCATCTGGAAGA  
TTCGCGACTACAAGCGGCGGAAGCAGGAGGCCGTCATGGGGAAGACCCTGTCC  
CTTTACAGCCAGCCTTTCTACACTGGTTACTTTGGCTATAAGATGTGTGCCAGG  
GTCTACCTGAACGGGGACGGGATGGGGAAGGGGACGCACTTGTGCGCTGTTTTT  
TGTCATCATGCGTGGAGAATATGATGCCCTGCTTCCTTGGCCGTTTAAGCAGAA

AGTGACACTCATGCTGATGGATCAGGGGTCTCTCGACGTCATTTGGGAGATGC  
ATTCAAGCCCGACCCCAACAGCAGCAGCTTCAAGAAGCCCACTGGAGAGATGA  
ATATCGCCTCTGGCTGCCAGTCTTTGTGGCCAAACTGTTCTAGAAAATGGGA  
CATATATTAAGATGATACAATTTTTATTAAAGTCATAGTGGATACTTCGGATC  
TGCCCGATCCCTGAaccagctttctgtacaaagtggtagcgtaaagctagggggccgttaaacccgctgatcagcct  
cgactgtgccttctagttgccagccatctgttgttcccctccccgtgccttccctgaccctggaaggtgccactcccactgtccttcc  
ctaataaaatgaggaaattgcacgcattgtctgagtaggtgcattctattctggggggtgggggtggggcaggacagcaagggggg  
aggattgggaagacaatagcaggcatgctggggatgcgggtgggctctatggcttctgaggcggaaagaaccagctggggctcta  
gggggtatccccacgcgcctgtagcggcgcatlaagcggcggggtgtgggttacgcgcagcgtgaccgctacacttcca  
gcgccttagcggcctcttctgcttcttcccttcttctcgcacgctcgcggcttccccgtcaagctctaaatcgggggctcc  
ctttaggggtccgatttagtctttacggcacctcgacccccaaaaaacttgattaggggtgatggttcacgtacctagaagtctattcc  
gaagtccctattctctagaaaagtataggaactccttggccaaaaagcctgaactcaccgcgacgtctgtcgagaagttctgatcgaa  
aagttcgacagcgtctccgacctgatgcagctctcggaggggcgaagaatctcgtgcttccagcttcgatgtagggggcgtggatat  
gtcctgcgggtaaatagctgcgccgatggttctacaaagatcgttatgtttatcggcacttgcacggccgcgctcccattccgga  
agtgttgacattggggaattcagcgagagcctgacctattgcactcccgcggtgcacagggtgcacgttgcaagacctgctga  
aacgaactgcccgtgttctgcagccggctgcggaggccatggatgcgatcgtcggccgatcttagccagacgagcgggtt  
cggcccattcggaccgaaggaatcggtaataactacatggcgtgattcatatgcgcgattgctgatccccatgtgatcactgg  
caactgtgatggacgacaccgtcagtgctcgcgcaggtctcgcgatgagctgatgcttggggcaggactgccccgaag  
tccggcacctcgtgcacgcggatttcggctccaacaatgtcctgacggacaatggccgcataacagcggctcattgactggagcga  
ggcgatgttcggggattcccaatcagaggtcggcaacatcttcttggaggccgtgggttgctgtatggagcagcagacgcgcta  
cttcgagcggaggcatccggagcttgacggatcggcgcggctccgggctatatgctccgattggcttgaccaactctatcaga  
gcttgggtgacggcaatttcgatgatgcagcttgggcgcagggctcgcgatgcacgcaatcgtccgatccggagccgggactgtcgg  
gcgtacacaaatgcccgcagaagcgcggcctcgtggaccgatggctgtgtagaagtactcgcgatagtggaaaccgacgccc  
cagcactcgtccgagggcaaaggaatagcacgtactacgagatttcgattccaccgccccttctatgaaaaggttgggcttcggaat  
cgttttccgggacgcccgttgatgatcctccagcgcggggtatcctatgctggagttcttcgcccacccaactgtttattgcagctt  
ataatggttacaataaagcaatagcatcacaatttcacaataaagcattttttcactgcattctagtgtggttgcctcaaacatca  
atgtatcttatcatgtctgtataccgtcacctctagctagagcttggcgtaacatcgtcagatgctgttctctgtgtgaaattgttatccgc  
tcacaattccacacaacatacagccggaagcataaagttaaagcctgggggtcctaatagagtgcagtaactcacattaattgcgtt  
gcgctcactgcccgttccagtcgggaaacctgtcgtgccagctgcattaatgaatcggccaacgcgcggggagagcgggttgc  
cgtattgggcgctcttccgcttctcgtcactgactcgtcgcctcggctcggctcggcgagcggatcagctcactcaaaag  
gcggtataacgggtatccacagaatcaggggataacgcaggaagaacatgtgagcaaaaggccagcaaaaggccaggaaccg  
taaaaaggccgctgtgctggcgttttccataggtccgccccctgacgagcatcacaataatcagcgtcaagtgcagaggtggc  
gaaaccgacaggactataaagataaccaggcgttccccctggaagctccctcgtcgcctcctctgttccgacctgcccgttaccg  
gatacctgtcccgttctccttccgggaagcgtggcgcttctcctatagctcacgctgtaggtatctcagttcgggtgtaggtcgttcgct  
ccaagctgggctgtgtgcacgaacccccgttcagcccgaccgctgcgccttatccgtaactatcgtttagtccaaccggtaa  
gacacgacttatcccactggcagcagccactggtaacaggattagcagagcagggtatgtaggcgggtgctacagagttctttaa  
gtggtggcctaactacggctacactagaagaacagtatttggatctcgcctcgtcgaagccagttaccttcggaaaaagagttggt  
agctcttgatccggcaaaacacaccgctggtagcgggtgttttttgaagcagcagattacgcgcagaaaaaaggatctc  
aagaagatccttgcattttctacggggtcgtacgctcagtggaacgaaaactcacgttaagggatttggctcatgagattatcaaaaa  
ggatcttcacctagatccttttaattaaaaatgaagtttaataatctaaagtatatagtaaaactggctgacagttaccaatgct  
taatcagtgaggcacctatctcagcgtctgtctatttctcctatcctatgctgactccccgctgctgtagataactacgatacggg  
agggcttaccatctggccccagtgctgcaatgataccgcgagaccacgctcaccggctccagatttatcagaataaaccagcca  
gccggaaggccgagcgcagaagtgtcctgcaactttatccgctccatccagcttattaattgttgcgggaagctagagtaagt



agttcgccagttaatagtttgcgcaacggtgttgccattgctacaggcatcgtggtgtcacgctcgtcgtttggtatggcttcattcagct  
ccggttccaacgatcaaggcagttacatgatccccatggtgtgcaaaaaagcggtagctcctcggctcctccgatcgtgtcag  
aagtaagttggccgagtggtatcactcatggtatggcagcactgcataattcttactgtcatgccatccgtaagatgcttttctgga  
ctggtgagtactcaaccaagtcattctgagaatagtgtatgcggcgaccgagttgctcttgcccggcgtaatacgggataataccg  
cgccacatagcagaactttaaagtgtcatcattggaaaacggtctcggggcgaaaactcctaaggatctaccgctgttgagatc  
cagttcgatgtaaccactcgtgcaccaactgatcttcagcatctttactttcaccagcgtttctgggtgagcaaaaacaggaaggc  
aaaatgccgcaaaaaaggaataaggcgacacggaaatgtgaatactcactcttcttttcaatattattgaagcatttatcagg  
gttattgtctcatgagcggatacatattgaatgtattgaaaaataaacaataaggggtccgcgcacatttccccgaaaagtgccac  
ctgacgtc

pTO-SII-HA-GW (TRAF2 N terminal)

gacggatcgggagatctcccgatcccctatgggtgactctcagtacaatctgctctgatgccgcataagccaagcagtatctgctccct  
gctgtgtgtggaggtcgtgagtagtgcgcgagcaaaatfaagctacaacaaggcaaggcttgaccgacaattgcatgaagaat  
ctgcttagggtaggcgttttgcgctgcttcgcatgtacgggcccagatatacgcgttgacattgattgactagttattaatagtaat  
caattacggggtcattagttcatagcccataatggagttccgcgttacataacttacggtaaatggcccgcctggctgaccgccc  
cgacccccgccattgacgtcaataatgacgtatgtcccatagtaacgccaatagggactttcattgacgtcaatgggtggagtatt  
tacggtaactgccacttgccagctacatcaagtgtatcatatgccaaagcagccccctattgacgtcaatgacggtaaatggcccgc  
ctggcattatgccagctacatgaccttatgggactttcctacttggcagctacatctacgtattatgctcgtattaccatgggtgatcgg  
ttttggcagctacatcaatgggctggatagcgggttgactcacgggatttccaagtctccaccccattgacgtcaatgggagttgttt  
tggcaccaaaatcaacgggactttccaaaatgtcgtacaactccgccccattgacgcaaatgggcccgtaggcgtgtacgggtggg  
aggtctatataagcagagctctccctatcagtgatagagatctccctatcagtgatagagatcgtcgcagcagctggttagtgaaccgt  
cagatcgcctggagacgccatccacgtgtttgacctcatagaagacaccgggaccgatccagcctccggactctagcgtttaa  
acttaagcttggtagcagctcggatccactagctccagtgtggtggaattctgcagatatccagcacagtggcggccgctcagac  
catgtaccatacagatgttcccgaactacgcccgtaccgagctcggatccaccatggctagctggagccaccgcagttcgagaaa  
gggtggaggttccggaggtggatcgggaggtggatcgtggagccaccgcagttcgaaaaagcggccgatatacaagttgtac  
aaaaaagcaggtccATGGCTGCAGCTAGCGTGACCCCCCTGGCTCCCTGGAGTTGCT  
ACAGCCCGGCTTCTCCAAGACCCTCCTGGGGACCAAGCTGGAAGCCAAGTACC  
TGTGCTCCGCCTGCAGAAACGTCTCCGCAGGCCCTTCCAGGCGCAGTGTGGCC  
ACCGTACTGCTCCTTCTGCCTGGCCAGCATCCTCAGCTCTGGGCCTCAGA  
ACTGTGCTGCCTGTGTTACGAGGGCATATATGAAGAAGGCATTTCTATTTT  
AGAAA GCAGTTCGGCCTTCCCAGATAATGCTGCCCCGAGGGAGGTGGAGAGCCTG  
CCG GCCGTCTGTCCCAGTGATGGATGCACCTGGAAGGGGACCCTGAAAGAATA  
CGA GAGCTGCCACGAAGGCCGCTGCCCGCTCATGCTGACCGAATGTCCC  
GCGTGCA AAGGCCTGGTCCGCCTTGGTGAAAAGGAGCGCCACCTGGAGC  
ACGAGTGCCCCG GAGAGAAGCCTGAGCTGCCGGCATTGCCGGCACCCTGCTG  
CGGAGCAGACGT GAAGGCGCACCACGAGGTCTGCCCAAGTTCCCTTAACTT  
GTGACGGCTGCG GCAAGAAGAAGATCCCCCGGAGAAGTTTCAGGACCACGT  
CAAGACTTGTGGC AAGTGTGAGTCCCTTGCAGATTCCACGCCATCGGCTG  
CCTCGAGACGGTAGA GGGTGAGAAACAGCAGGAGCACGAGGTGCAGTGGCTG  
CGGGAGCACCTGGCC ATGCTACTGAGCTCGGTGCTGGAGGCAAAGCCCCTCTT  
GGGAGACCAGAGCCA CGCGGGGTCAGAGCTCCTGCAGAGGTGCGAGAGCCTG  
GAGAAGAAGACGGCC ACTTTTGAGAACATTGTCTGCGTCTGAACCGGGAGGT  
GGAGAGGGTGGCCAT GACTGCCGAGGCCTGCAGCCGGCAGCACCGGCTGGACCA  
AGACAAGATTGAA GCCCTGAGTAGCAAGGTGCAGCAGCTGGAGAGGAGCATTGGC  
CTCAAGGACCTGGCGATGGCTGACTTGGAGCAGAAGGTCTTGGAGATGGAGGCAT  
CCACCTACG ATGGGGTCTTCATCTGGAAGATCTCAGACTTCGCCAGGAAGCGCC  
AGGAAGCTGTGGCTGGCCGCATACCCGCCATCTTCTCCCCAGCCTTCTACACC  
AGCAGGTAC GGCTACAAGATGTGTCTGCGTATCTACCTGAACGGCGACGGCACC  
GGGCGAGG AACACACCTGTCCCTCTTCTTTGTGGTGAAGGGCCCGAATGACGCC  
CTGCTGCGGTGGCCCTTCAACCAGAAGGTGACCTTAATGCTGCTCGACCAGAATA  
ACC GGGAGCACGTGATTGACGCCTTCAGGCCCGACGTGACTTCATCCTCTTTTCAG  
A GGCCAGTCAACGACATGAACATCGCAAGCGGCTGCCCCCTCTTCTGCCCCGTCT  
CCAAGATGGAGGCAAAGAATTCCTACGTGCGGGACGATGCCATCTTCATCAAG

GCCATTGTGGACCTGACAGGGCTCTTGTGAaccagcttctgtacaaagtggtagcgtaaagctaggg  
gcccgttfaaaccgctgatcagcctcactgtgccttctagtgccagccatctgtgttggccccccccctgccttccttgaccct  
ggaaggtgccactcccactgtcctttcctaataaaatgaggaaattgcacgcattgtctgagtaggtgcattctattctggggggg  
gggtggggcaggacagcaagggggaggattgggaagacaatagcaggcatgctggggatgcgggtgggctctatggctctgag  
gcggaaagaaccagctggggctctaggggtatccccacgcgccctgtagcggcgcaataagcgcggcggtgtgtgtgttac  
gcgcagcgtgaccgctacactgccagcgccttagcggccgtccttctccttctccttctccttctcgcacgttcgccggttcc  
ccgtcaagctctaaatcgggggctccccttaggggtccgatttagtgctttacggcacctcgacccccaaaaaactgattaggggtgat  
gttcacgtacctagaagttcctattccgaagttcctattctctagaagtataggaactccttgccaaaaagcctgaactaccgcg  
acgtctgtcagaagttctgatcgaagttcgacagcgtctccgacctgatgcagctctcggaggcgaagaatctcgtcttca  
gcttcgatgtagggggcgtggatatgtctgcgggtaaatagctgcgccgatggttctacaaagatcgttatgtttatcggcactt  
gcatcggccgcgtcccgattccggaagtgttgacattgggggaattcagcgaagcctgacctattgcatctcccgccgtgcaca  
gggtgtcacgttgcaagacctgcctgaaaccgaactgcccgctgttctgcagccggcgcggaggccatggatgcgatcgtcgc  
gccgatcttagccagacgagcgggttcggcccattcggaccgcaaggaatcggcaatacactacatggcgtgatttcatatgcgc  
gattgctgatccccatgtgatcactggcaactgtgatggacgacaccgtcagtgctcgcgcagggctctcgtgatgagctgat  
gcttggggcaggactgccccgaagtcggcacctcgtgcacgcggatttcggctccaacaatgtctgacggacaatggccgc  
ataacagcggctactgactggagcgaaggatgttcggggattccaatacagagtcgccaacatcttcttctggaggccgtggtg  
gcttctgtaggagcagcagcgcgtacttcgagcggaggcatccggagcttcagggatcggcgcggctccggcgctatgctcc  
gcattggtcttgaccaactctacagagcttggtgacggcaatttcgatgatgcagcttggggcagggctcgtgatgcgacgaatc  
ccgatccggagccgggactgtcggggtacacaaatcggcgagaagcgcggcgtctggaccgatggctgtgtagaagct  
cgccgatagtgaaaccgacgccccagcactcgtccgagggcaaggaatagcacgtactacgagatttcgattccaccgccc  
cttctatgaaaggtgggcttcggaatcgtttccgggacggcggtggatgatctccagcgcggggatctcgtgaggtcttc  
gcccacccaactgtttattgcagcttataatggtfacaataaagcaatagcatcacaatttcacaataaagcatttttctactgca  
ttctagttgtggttgcacaaactcaatgtatcttatcatgtctgtataaccgtcgacctctagctagagcttggcgtaatcatggtcata  
gctgttctctgtgaaattgtatccgctcacaattccacacaacatacagccggaagcataaagtgtaaagcctgggggtgcctaat  
gagtgagctaacacattaattgcgttgcgctcactgcccgttccagtcgggaacctgctgctgaccgtgcattaatgaatcgg  
ccaacgcgcgggagaggcgggttgcgtattggcgctctccgcttctcgtcactgactcgtcgcctcggctcgttcggctgcg  
gcgagcggatcagctcactcaaaggcggtaatacgggtatccacagaatcaggggataacgcaggaaagacatgtgagcaaa  
aggccagcaaaaggccaggaaccgtaaaaaggccggtgctggcgttttccataggtccgccccctgacgagcatcaca  
aatcagcgtcaagtcagaggtggcgaaccgacaggactataaagataaccaggcgttccccctggaagctccctcgtcgcgt  
ctcctgttccgacctgcccgttaccggatacctgtccgcttctccttccgggaagcgtggcgcttctcatagctcacgctgtaggt  
atctcagttcgggtgtaggtcgttcgctccaagctgggctgtgtgcacgaacccccgttcagcccagccgctgcgccttatccggt  
actatcgtttagtccaaccggtaagacacgacttatgccactggcagcagccactggtaacaggattagcagagcaggtat  
gtaggggtgctacagagttctgaagtgggtgacactcggctacactagaagaacagatattggtatctcgcctcgtcgtgaagc  
cagttaccttcgaaaaagagttgtagctcttgatccggcaaaaccaccgctggtagcgggtgtttttgtttgcaagcagca  
gattacgcgcagaaaaaaggatctcaagaatccttgatctttctacggggtctgacgctcagtggaacgaaaactcacgtaa  
gggattttggtcatgagattacaaaaaggatcttccactagatccttttaataaaaatgaagtttaaatcaatctaaagtatatag  
taaactggctgacagttaccaatgcttaacagtgaggcacctatctcagcagatctgtctatttcgttcatcatagttgectgactccc  
cgctcgtgtagataactcagatacgggagggcttaccatctggccccagtgctgcaatgataccgcgagaccacgctcaccggctc  
cagattatcagcaataaaccagccagccggaaggccgagcgcagaagtggctcgtcaactttatccgctccatccagctatta  
attgttgcgggaagctagagtaagtagttccagttaatagtttgcgaacgttgttgcattgctacaggcatcgtggtgcacgc  
tcgtcgtttggtatggcttattcagctccggttccaacgatcaaggcgagttacatgatccccatgtgtgcaaaaaagcggtag  
ctccttcggctcctccgatcgttgcagaagtaagttggccgaggttatcactcatggttatggcagcactgcataattcttactgtc  
atgccatccgtaagatccttctgtgactggtagtactcaaccaagtcattctgagaatagtgatgcggcgaccgagttgctcttgc

ccggcgtcaatacgggataataccgcgccacatagcagaactttaaaagtgtcatcattggaaaacgttcttcggggcgaaaactc  
tcaaggatcttaccgctgttgagatccagtcgatgaaccactcgtgcaccaactgatcttcagcatctttactttcaccagcgttf  
ctgggtgagcaaaaacaggaaggcaaatgccgcaaaaagggaataagggcgacacggaaatgtgaatactcatactcttct  
tttcaatattattgaagcattatcagggttattgtctcatgagcggatacatattgaatgtattagaaaaataaacaatatggggttcc  
gcgcacatttcccgaaaagtgccacctgacgtc

pTO-SII-HA-GW (IKKalpha N terminal)

gacggatcgggagatctcccgatcccctatggtgcactctcagtaacaatctgctctgatgccgcataagccaagcagtatctgctccct  
gctgtgtgttgaggctcgtgagtagtgcgcgagcaaaatctaagctacaacaaggcaaggcttgaccgacaattgcatgaagaat  
ctgcttagggtaggcgtttgcgctgcttcgcatgtacgggcccagatatacgcgttgacattgattgactagttattaatagtaat  
caattacggggtcattagttcatagcccataatgaggttccgcgttacataacttacggtaaatggcccgcctggctgaccgccc  
cgacccccgccattgacgtcaataatgacgtatgtcccatagtaacgccaatagggactttccattgacgtcaatgggtggagtatt  
tacggtaactgccacttgccagctacatcaagtgtatcatatgccaaagcagccccctattgacgtcaatgacggtaaatggcccgc  
ctggcattatgccagctacatgaccttattgggactttcctacttggcagctacatctacgtattatgctcgtattaccatgggtgatcgg  
tttggcagctacatcaatgggctggatagcgggttgactcacgggattccaagtctccaccccattgacgtcaatgggagttgttt  
tggcaccaaaatcaacgggactttccaaaatgctgtaacaactccgccccattgacgcaaatgggaggtaggcgtgtacgggtggg  
aggtctatataagcagagctctccctatcagtgatagagatctccctatcagtgatagagatcgtcgcagagctcgtttagtgaacct  
cagatcgcctggagacgccatccacgctgtttgacctcatagaagacaccgggaccgatccagcctccggactctagcgtttaa  
acttaagcttggtaccgagctcggatccactagctccagtgtggtggaattctgcagatatccagcacagtggcggccgctcagac  
catgtaccatacagatgttcccgaactacgcccgtaccgagctcggatccaccatggctagctggagccaccgcagttcagaaaa  
gggtggaggttccggaggtggatcgggaggtggatcgtggagccaccgcagttcgaanaagcggccgatatacaagttgtac  
aaaaaagcaggtccATGGAGCGGCCCGGGGCTGCGGCCGGGCGCGGGCGGGCCCT  
GGGAGATGCGGGAGCGGCTGGGCACCGGCGGCTTCGGGAACGTCTGTCTGTAC  
CAGCATCGGGAACCTTGATCTCAAATAGCAATTAAGTCTTGTCTCCTAGAGCTA  
AGTACCAAAAACAGAGAACGATGGTGCCATGAAATCCAGATTATGAAGAAGTT  
GAACCATGCCAATGTTGTAAAGGCCTGTGATGTTCCCTGAAGAATTGAATATTT  
GATTCATGATGTGCCTCTTCTAGCAATGGAATACTGTTCTGGAGGAGATCTCCG  
AAAGCTGCTCAACAAACCAGAAAATTGTTGTGGACTTAAAGAAAGCCAGATAC  
TTTCTTTACTAAGTGATATAGGGTCTGGGATTTCGATATTTGCATGAAAACAAAA  
TTATACATCGAGATCTAAAACCTGAAAACATAGTTCTTCAGGATGTTGGTGGAA  
AGATAATACATAAAAATAATTGATCTGGGATATGCCAAAGATGTTGATCAAGGA  
AGTCTGTGTACATCTTTTGTGGGAACACTGCAGTATCTGGCCCCAGAGCTCTTT  
GAGAATAAGCCTTACACAGCCACTGTTGATTATTGGAGCTTTGGGACCATGGTA  
TTTGAATGTATTGCTGGATATAGGCCTTTTTTGCATCATCTGCAGCCATTTACCT  
GGCATGAGAAGATTAAGAAGAAGGATCCAAAGTGTATATTTGCATGTGAAGAG  
ATGTCAGGAGAAGTTCGGTTTAGTAGCCATTTACCTCAACCAAAATAGCCTTTGT  
AGTTTAGTAGTAGAACCCATGGAAAACCTGGCTACAGTTGATGTTGAATTGGGA  
CCCTCAGCAGAGAGGAGGACCTGTTGACCTTACTTTGAAGCAGCCAAGATGTT  
TTGTATTAATGGATCACATTTTGAATTTGAAGATAGTACACATCCTAAATATGA  
CTTCTGCAAAGATAATTTCTTTTCTGTTACCACCTGATGAAAGTCTTCATTCCT  
ACAGTCTCGTATTGAGCGTGAAACTGGAATAAATACTGGTTCTCAAGAACTTCT  
TTCAGAGACAGGAATTTCTCTGGATCCTCGGAAACCAGCCTCTCAATGTGTTCT  
AGATGGAGTTAGAGGCTGTGATAGCTATATGGTTTATTTGTTTGATAAAAGTAA  
AACTGTATATGAAGGGCCATTTGCTTCAGAAAGTTTATCTGATTGTGTAAATTA  
TATTGTACAGGACAGCAAAATACAGCTTCCAATTATACAGCTGCGTAAAGTGT  
GGGCTGAAGCAGTGCACATATGTGTCTGGACTAAAAGAAGACTATAGCAGGCTC  
TTCAGGGACAAAGGGCAGCAATGTTAAGTCTTCTTAGATATAATGCTAACTTA  
ACAAAAATGAAGAACACTTTGATCTCAGCATCACAACAACCTGAAAGCTAAATT  
GGAGTTTTTTCACAAAAGCATTGACTTGGAGAGATACAGCGAGCAGA

TGACGTATGGGATATCTTCAGAAAAAATGCTAAAAGCATGGAAAGAAATGGAA  
GAAAAGGCCATCCACTATGCTGAGGTTGGTGTCATTGGATACCTGGAGGATCA  
GATTATGTCTTTGCATGCTGAAATCATGGAGCTACAGAAGAGCCCCTATGGAA  
GACGTCAGGGAGACTTGATGGAATCTCTGGAACAGCGTGCCATTGATCTATAT  
AAGCAGTTAAAACACAGACCTTCAGATCACTCCTACAGTGACAGCACAGAGAT  
GGTGAAAATCATTGTGCACACTGTGCAGAGTCAGGACCGTGTGCTCAAGGAGC  
TGTTTGGTCATTTGAGCAAGTTGTTGGGCTGTAAGCAGAAGATTATTGATCTAC  
TCCCTAAGGTGGAAGTGGCCCTCAGTAATATCAAAGAAGCTGACAATACTGTC  
ATGTTTCATGCAGGGAAAAAGGCAGAAAGAAATATGGCATCTCCTTAAAATTGC  
CTGTACACAGAGTTCTGCCCGTCCCTTGTAGGATCCAGTCTAGAAGGTGCAGT  
AACCCCTCAGACATCAGCATGGCTGCCCCGACTTCAGCAGAACATGATCATT  
TCTGTCATGTGTGGTAACCTCAAGATGGGGAGACTTCAGCACAAATGATAG  
AAGAAAATTTGAACTGCCTTGGCCATTTAAGCACTATTATTCATGAGGCAAATG  
AGGAACAGGGCAATAGTATGATGAATCTTGATTGGAGTTGGTTAACAGAATGAt  
acccagctttctgtacaaagtggtagcgtaggggcccgttaaaccgctgatcagcctcactgtgccttctagttgcca  
gcatctgtgtttgcccctccccctgccttctgacctggaaggtgccactcccactgtccttctcaataaaatgaggaattgc  
atgcattgtctgagtaggtgtcattctattctggggggtgggggagggcaggacagcaagggggaggattgggaagacaatagc  
aggcatgctggggatgcggtgggctctatggcttctgaggcggaaagaaccagctggggctctagggggtatccccacgcgcc  
ttagcggcgcaataagcgcggcgggtgtggtggttacgcgcagcgtgaccgtacacttgcagcgccttagcggccgctcctt  
cgctttctcccttcttctcgcacgctcgcggcttccccgtcaagctctaaatcgggggctccctttaggggtccgatttagtgcct  
tacggcactcgaccccaaaaacttgattaggggtgatggtcacgtacctagaagttcctattccgaagttcctattcttagaaagta  
taggaactccttggccaaaaagcctgaactaccgcgacgtctgtcagaaagttctgatcgaagttcgacagcgtctccgacc  
tgatgcagctctcggagggcgaagaatctcgtccttcagcttcgatgtagggggcgtggatgtcctgcgggtaaatagctgcg  
ccgatggtttcacaagatcggtatgtttatcggcactttgcatcggccgcgctcccgatccggaagtgcctgacattggggaattca  
gcgagagcctgacctattgcatctcccgcctgacacaggggtgacggttgaagacctgctgaaaccgaactcccgctgttctg  
cagccggtcgcggaggccatggatgcgacgctcggccgatcttagccagacgagcgggtcggccattcggaccgcaagg  
aatcggcacaactacatggcgtgattcatatgcgcgattgctgatccccatgtgtatcactggcaactgtgatggacgacacc  
gtcagtgcgtccgctcgcgagcctctcagatgactgatgctttgggcccaggactgccccgaagtccggcacctcgtgcacgccc  
atctcggctcaacaatgtcctgacggacaatggccgataacagcggctcattgactggagcaggcgatgttcggggattcccaa  
tacagggtcgcacaactcttcttgaggccgtggttgctttagtgagcagcagacgcgctactcagcggaggcatccgga  
gcttgcaggatcgcgcggctccgggctatctcgcgattggtcttgaccaactctatcagagcttggtgacggcaattcgat  
gatgcagcttgggcgagggtgatgcgacgcaatcgtccgatccggagccgggactgtcgggctacacaaaatcggccgag  
aagcgcggccgtctggaccgatggctgtgtagaagctcgcgatagtggaaccgacccccagcactcgtccgagggcaaa  
ggaatagcagctactacgagattcattccaccgccctctatgaaaggtgggcttcggaatcgtttccgggacgccggctg  
gatgatcctccagcgcgggatctcatgctggagttctcggccaccaactgtttattgcagcttataatggttacaataaagca  
atagcatcacaatttcacaataaagcattttttcactgcattctagttgtggttgcacaaactcatcaatgtatcttcatgtctgata  
ccgtcgaactctagctagagcttggcgtaatcatggtcatagctgttctctgtgaaattgtatccgctcacaattccacacaacata  
cgagccggaagcataaagttaaagcctgggggtcctaataagtgagctaaactcattaattgcgttcgctcactgcccgtttc  
cagtcgggaaacctgtcgtccagctgcattaatgaatcggccaacgcgcggggagaggcggttgcgtattgggctcctccg  
cttctcgtcactgactcgtcgtcggctgctcggctgcggcagcggatcagctcactcaaaaggcggaatacggttatcca  
cagaatcaggggataacgcaggaaagaacatgtgagcaaaaggccagcaaaaggccaggaaccgtaaaaaggccgctgtct  
ggcggttttccataggctccgccccctgacgagcatcacaataatcagcgtcaagtcagaggtggcgaaaccggacaggacta  
taaagataccaggcggttccccctggaagctccctcgtgcgctctctgttccgacctgccgcttaccggatacctgtccgctttct

cccttcgggaagcgtggcgctttctcatagctcacgctgtaggtatctcagttcgggtgtaggtcgttcgctccaagctgggctgtgtgc  
acgaacccccggtcagcccgaccgctgcgccttatccggtaactatcgtcttgagtccaacccggtaagacacgacttatcgccac  
tggcagcagccactggaacaggattagcagagcgaggatgtagggcggtctacagagttcttgaagtgggtggcctaactacgg  
ctacactagaagaacagtatttggtatctgcgctctgctgaagccagttaccttcggaaaaagagttggtagctcttgatccggcaaa  
caaaccaccgctggtagcgggtggttttttgttgcaagcagcagattacgcgcagaaaaaaggatctcaagaagatcctttgatctt  
ttctacggggctgacgctcagtggaacgaaaactcacgtaagggttttggatgagattatcaaaaaggatcttcacctagatcc  
ttttaaattaaaaatgaagttttaaataatctaaagtatatatgagtaaactggctgacagttaccaatgcttaacagtgaggcacct  
atctcagcgatctgtctatttcgttcatccatagttgcctgactccccgctgtagataactacgatacgggaggggcttaccatctggc  
cccagtgctgcaatgataccgcgagaccacgctcaccggctccagattatcagcaataaaccagccagccggaagggccgag  
cgcagaagtggctctgcaactttatccgcctccatccagctattaattgttccgggaagctagagtaagtagttcggcagtaatagt  
ttgcgcaacgtgttgcattgtctacagggcatcgtgggtgcacgctcgtcgttggatggcttcattcagctccggtccaacgatca  
aggcgagttacatgatccccatggttgcaaaaaagcggtagctccttcggctcccgatcgttgcagaagtaagttggccgcag  
tgttaccactcatggttatggcagcactgcataattcttactgtcatgccatccgtaagatgcttttctgtgactggtagtactcaacc  
aagtcattctgagaatagtgtatgcggcgaccgagttgctcttccccggcgtcaatacgggataataccgcgccacatagcagaact  
ttaaagtgtcatcattggaaaacgttcttcggggcgaactctcaaggatctaccgctgttgagatccagttcgatgtaaccac  
tcgtgcaccaactgatcttcagcatctttactttcaccagcgttctgggtgagcaaaaacaggaaggcaaatgcccaaaaaag  
ggaataagggcgacacggaaatgttgaatactcatactctcttttcaatattattgaagcatttatcaggggtattgtctcatgagcgg  
atacatatttgaatgtatttagaaaaataaacaatataggggtccgcgcacatttccccgaaaagtgccacctgacgtc

pTO-SII-HA-GW (NfkappaB2-p100 N terminal)

gacggatcgggagatctcccgatcccctatggtgcactctcagtacaactctgctctgatgccgcataagccaagcagtatctgctccct  
gctgtgtgtggaggtcgtgagtagtgcgcgagcaaaatctaagctacaacaaggcaaggcttgaccgacaattgcatgaagaat  
ctgcttagggtaggcgtttgcgctgcttcgcatgtacgggcccagatatacgcgttgacattgattgactagttattaatagtaat  
caattacggggtcattagttcatagcccataatgaggttccgcgttacataacttacggtaaatggcccgcctggctgaccgccc  
cgacccccgccattgacgtcaataatgacgtatgtcccatagtaacgccaatagggactttcattgacgtcaatgggtggagtatt  
tacggtaactgccacttggcagtacatcaagtgtatcatatgccaaagcagccccctattgacgtcaatgacggtaaatggcccgc  
ctggcattatgccagtagacattatgggactttcctacttggcagtagctacgtattatgctatgctattaccatgggtgatcggg  
tttggcagtagcatcaatgggctggatagcgggttgactcaggggattccaagtctccaccccattgacgtcaatgggagttgttt  
tggcaccaaaatcaacgggactttccaaaatgctgtaacaactccgccccattgacgcaaatgggaggtaggcgtgtacgggtggg  
aggtctatataagcagagctctccctatcagtgatagagatctccctatcagtgatagagatcgtcgcagagctcgtttagtgaacct  
cagatcgcctggagacgccatccacgctgtttgacctcatagaagacaccgggaccgatccagcctccggactctagcgtttaa  
acttaagcttggtagcagctcggatccactagtcagtggtggaattctgcagatatccagcacagtgggcggccgctcagac  
catgtaccatacagatgttcccgaactcgcgggtaccgagctcggatccaccatggctagctggagccaccgcagttcagaaaa  
gggtggaggttccggaggtggatcgggaggtggatcgtggagccaccgcagttcgaaaaagcggccgatatacaagttgtac  
aaaaaagcaggtccATGGAGAGTTGCTACAACCCAGGTCTGGATGGTATTATTGAATA  
TGATGATTTCAAATTGAACTCCTCCATTGTGGAACCCAAGGAGCCAGCCCCAG  
AAACAGCTGATGGCCCCTACCTGGTGATCGTGGAACAGCCTAAGCAGAGAGGC  
TTCCGATTTGATATGGCTGTGAAGGCCCTCCCATGGAGGACTGCCCGGTGCC  
TCCAGTGAGAAGGGCCGAAAGACCTATCCCACTGTCAAGATCTGTAACCTACGA  
GGGACCAGCCAAGATCGAGGTGGACCTGGTAACACACAGTGACCCACCTCGTG  
CTCATGCCACAGTCTGGTGGGCAAGCAATGCTCGGAGCTGGGGATCTGCGCC  
GTTTCTGTGGGGCCCAAGGACATGACTGCCCAATTTAACAACCTGGGTGTCCTG  
CATGTGACTAAGAAGAACATGATGGGGACTATGATACAAAACCTTCAGAGGCA  
GCGGCTCCGCTCTAGGCCCCAGGGCCTTACGGAGGCCGAGCAGCGGGAGCTGG  
AGCAAGAGGCCAAAGAAGACTGAAGAAGGTGATGGATCTGAGTATAGTGCGGCT  
GCGCTTCTCTGCCTTCTTAGAGCCAGTGATGGCTCCTTCTCCCTGCCCTGAAG  
CCAGTCATCTCCAGCCCATCCATGACAGCAAATCTCCGGGGGCATCAAACCT  
GAAGATTTCTCGAATGGACAAGACAGCAGGCTCTGTGCGGGGTGGAGATGAAG  
TTTATCTGCTTTGTGACAAGGTGCAGAAAGATGACATTGAGGTTTCGGTTCTATG  
AGGATGATGAGAATGGATGGCAGGCCTTTGGGGACTTCTCTCCACAGATGTG  
CATAAACAGTATGCCATTGTGTTCCGGACACCCCCCTATCACAAGATGAAGATT  
GAGCGGCCTGTAACAGTGTCTGCAACTGAAACGCAAGCGAGGAGGGGACGT  
GTCTGATTCCAAACAGTTCACCTATTACCCTCTGGTGGAAAGACAAGGAAGAGG  
TGCAGCGGAAGCGGAGGAAGGCCTTGCCCACCTTCTCCAGCCCTTCGGGGGT  
GGCTCCACATGGGTGGAGGCTCTGGGGGTGCAGCCGGGGGCTACGGAGGAGC  
TGGAGGAGGTGGCAGCCTCGGTTTCTTCCCCTCCTCCCTGGCCTACAGCCCCTA  
CCAGTCCGGCGCGGGCCCCATGGGCTGCTACCCGGGAGGCGGGGGCGGGGCGC  
AGATGGCCGCCACGGTGCCAGCAGGGACTCCGGGGAGGAAGCCGCGGAGCC  
GAGCGCCCCCTCAGGACCCCCAGTGCGAGCCGCAGGCCCCGGAGATGCTGC  
AGCGAGCTCGAGAGTACAACGCGCGCCTGTTTCGGCCTGGCGCAGCGCAGCGCC  
CGAGCCCTACTCGACTACGGCGTCACCGCGGACGCGCGCGCGCTGCTGGCGGG  
ACAGCGCCACCTGCTGACGGCGCAGGACGAGAACGGAGACACACCACTGCAC



CTAGCCATCATCCACGGGCAGACCAGTGTTCATTGAGCAGATAGTCTATGTCATC  
CACCACGCCAGGACCTCGGCGTTGTCAACCTCACCAACCACCTGCACCAGAC  
GCCCCTGCACCTGGCGGTGATCACGGGGCAGACGAGTGTGGTGAGCTTTCTGC  
TGCGGGTAGGTGCAGACCCAGCTCTGCTGGATCGGCATGGAGACTCAGCCATG  
CATCTGGCGCTGCGGGCAGGCGCTGGTGTCTCTGAGCTGCTGCGTGCCTGCTT  
CAGAGTGGAGCTCCTGCTGTGCCCCAGCTGTTGCATATGCCTGACTTTGAGGGA  
CTGTATCCAGTACACCTGGCGGTCCGAGCCCGAAGCCCTGAGTGCCTGGATCTG  
CTGGTGGACAGTGGGGCTGAAGTGGAGGCCACTGAGCGGCAGGGGGGACGAA  
CAGCCTTGCATCTAGCCACAGAGATGGAGGAGCTGGGGTTGGTCACCCATCTG  
GTCACCAAGCTCCGGGCCAACGTGAACGCTCGCACCTTTGCGGGAAACACACC  
CCTGCACCTGGCAGCTGGACTGGGGTACCCGACCCTCACCCGCCTCCTTCTGAA  
GGCTGGTGTGACATCCATGCTGAAAACGAGGAGCCCTGTGCCACTGCCTTC  
ACCCCTACCTCTGATAGCGACTCGGACTCTGAAGGGCCTGAGAAGGACACCC  
GAAGCAGCTTCCGGGGCCACACGCCTCTTGACCTCACTTGCAGCACCAAGGTG  
AAGACCTTGCTGCTAAATGCTGCTCAGAACACCATGGAGCCACCCCTGACCCC  
GCCCAGCCCAGCAGGGCCGGGACTGTCACTTGGTGATACAGCTCTGCAGAACC  
TGAGCAGCTGCTAGACGGGCCAGAAGCCAGGGCAGCTGGGCAGAGCTGGC  
AGAGCGTCTGGGGCTGCGCAGCCTGGTAGACACGTACCGACAGACAACCTCAC  
CCAGTGGCAGCCTCCTGCGCAGCTACGAGCTGGCTGGCGGGGACCTGGCAGGT  
CTACTGGAGGCCCTGTCTGACATGGGCCTAGAGGAGGGAGTGAGGCTGCTGAG  
GGGTCCAGAAACCCGAGACAAGCTGCCAGCACAGAGGTGAAGGAAGACAGT  
GCGTACGGGAGCCAGTCAGTGGAGCAGGAGGCAGAGAAGCTGGGCCACCCC  
CTGAGCCACCAGGAGGGCTCTGCCACGGGCACCCCCAGCCTCAGGTGCACTGA  
acccagctttctgtacaaagtggtagacgtaagctaggggcccgttaaaccgctgatcagcctcagctgtgccttctagtcca  
gcatctgttgttcccctccccgctgccttctgacctggaaggtgccactcccactgtccttctcaataaaatgaggaaattgc  
atcgattgtctgagtaggtgtcattctattctggggggtgggggtggggcaggacagcaagggggaggattgggaagacaatagc  
aggcatgctggggatgctgggtgggtctatggcttctgagggcgaagaaccagctggggctctagggggtatccccacgcgcc  
ttagcggcgcaataagcgcggcggtgtggtgttacgcgcagcgtgaccgtacactgccagcgccttagcgcctgctcctt  
cgctttctccttctctcctgccacgttcgccggttccccgctcaagctctaaatcgggggctccccttaggggtccgattagtctt  
tacggcacctcgaccccaaaaaactgattagggatgaggttacgtacctagaagttcctatttctagaaagta  
taggaactccttgcccaaaaagcctgaactcaccgcgacgtctgtcagaagtttctgatcgaaggtcgacagcgtctccgacc  
tgatgcagctctcggagggcgaagaatctcgtcttccagcttcgatgtaggagggcgtggatgtctcctgcgggtaaatagctgcg  
ccgatggtttctacaaagatcgttatgtttatcggcactttgcatcggccgcgctcccattccggaagtcttgacattgggggaattca  
gcgagagcctgacctattgcatctcccgcctgcacaggggtgcacgttgcaagacctgctgaaaccgaactcccgtgttctg  
cagccggtcgcggaggccatggatgcgatcgtcggccgatcttagccagacgagcgggttcggccattcggaccgcaagg  
aatcgggtcaatacaactacatggcgtgattcatatgcgcgattgctgatccccatgtgtatcactggcaactgtgatggacgacacc  
gtcagtgctcgcgcagcgtctcgtgatgagctgatgctttgggcccaggactgccccgaagtccggcacctcgtgcacgcgg  
atttcggctccaacaatgtcctgacggacaatggccgataacagcggctcattgactggagcagggcgtgctggggattcccaa  
tacgaggtcgcacaactcttcttgaggccgtgggtgcttctgatggagcagcagacgcgctacttcgagcggaggcatccgga  
gcttcaggatcgcgcggctccgggctatatgctccgattgcttaccactctatcagagcttgggtgacggcaatttcgat  
gatgcagcttgggcccagggctgatgcgacgcaatcgtccgatccggagccgggactgtcgggctacacaatcggccgag  
aagcgcggcctctggaccgatggctgtgagaagtactcgcgatagtggaaccgacccccagcactcgtccgagggcaaa  
ggaatagcacgtactacgagatttcgattccaccgcccttctatgaaaggtgggcttcggaatcgtttccgggacgccggctg

gatgacctccagcgcggggatctcatgctggagttctcgccaccccaactgtttattgcagcttataatggttacaataaagca  
atagcatcacaatttcacaaataaagcattttttcactgcattctagttgtggtttgtccaaactcatcaatgtatcttatcatgtctgtata  
ccgtcgacctctagctagagcttggcgtaaatcatggtcatagctgtttcctgtgtgaaattgtatccgctcacaattccacacaacata  
cgagccggaagcataaagtgtaaagcctggggtgcctaataagtgagtaactcacattaattgcgttcgctcactgcccgtttc  
cagtcgggaaacctgtcgtccagctgcattaatgaatcgccaacgcgcggggagaggcggtttcggtattgggcgctcttccg  
cttctcgtcactgactcgtcgcctcggctgttcggctgcggcgagcgggtatcagctcactcaaaggcggtaatacggttatcca  
cagaatcaggggataacgcaggaagaacatgtgagcaaaaaggccagcaaaaaggccaggaaccgtaaaaaggccgctgtgct  
ggcggttttccataggctccgccccctgacgagcatcacaaaaatcgacgctcaagtcagagggtggcgaaaccgacaggacta  
taaagataaccaggcgtttccccctggaagctccctcgtcgcctcctcgttccgacctgcccgttaccggatacctgtccgctttct  
ccctcgggaagcgtggcgcttttctatagctcacgctgtaggtatctcagttcgggtgtaggtcgttcgctccaagctgggctgtgtgc  
acgaacccccgttcagcccagccgctgcgcttatccgtaactatcgtcttgagtcacaaccggtaagacacgacttatcgccac  
tggcagcagccactgtaacaggattagcagagcaggtatgtaggcgggtctacagagttctgaagtgggtggcctaactacgg  
ctacactagaagaacagtatgtggtatctgcgctcgtcgaagccagttacctcggaaaaagagttggtagctcttgatccggcaaa  
caaacaccgctggtagcgggtggtttttgttgcaagcagcagattacgcgcagaaaaaaaggatctcaagaagatcctttgatctt  
ttctacggggtctgacgctcagtggaacgaaaactcacgtaagggattttgggtcatgagattacaaaaaggatcttcacctagatcc  
tttaaaataaaaaatgaagtttaaatcaatctaaagtataatagtaaaacttggtctgacagttaccaatgcttaacagtgaggcacct  
atctcagcgtatgtctatttcgttcacatagttgctgactccccgtcgtgtagataactacgatacgggaggggcttaccatctggc  
cccagtgctgcaatgataccgcgagaccacgctcaccggctccagattatcagcaataaaccagccagccggaaggccgag  
cgcagaagtggctctgcaactttatccgctccatccagcttataattgttccggggaagctagagtaagtagttccagttaatagt  
ttgcgcaacgttgttgcattgtctacagggatcgtggtgtcagctcgtcgtttgggtatggcttcaatcagctccggttccaacgatca  
aggcgagttacatgatccccatgttgtgcaaaaaagcgggttagctccttcggctcctccgatcgttgcagaagtaagttggccgcag  
tgtatcactcatggttatggcagcactgcataattctcttactgtcatgccatccgtaagatgcttttctgtgactggtgagtactcaacc  
aagtcattctgagaatagtgatgcggcgaccgagttgctcttggcggcgtcaatacgggataataccgcgccacatagcagaact  
ttaaagtgtcctcattggaaaacgttcttcggggcgaaaaactctcaaggatcttaccgctgttgagatccagttcgatgtaaccac  
ctgtgcaccaactgatcttcagcatctttactttcaccagcgtttctgggtgagcaaaaacaggaaggcaaatgcccaaaaaag  
ggaataaggcgacacggaaatgtgaatactcactcttcttttcaatattattgaagcatttatcagggttattgtctcatgagcgg  
atacatattgaatgtatttagaaaaataacaaataggggttccgcgcacattccccgaaaagtccacctgacgtc

pTO-SII-HA-GW (NIK N terminal)

gacggatcgggagatctcccgatcccctatgggtcactctcagtaacaatctgctctgatgccgcataagccaagcagtatctgctccct  
gctgtgtgtggaggtcgtgagtagtgcgcgagcaaaathtaagctacaacaaggcaaggcttgaccgacaattgcatgaagaat  
ctgcttagggtaggcgttttgcgctgcttcgcatgtacgggcccagatatacgcgttgacattgattgactagttattaatagtaat  
caattacggggtcattagttcatagcccataatggagttccgcgttacataacttacggtaaatggcccgcctggctgaccgccc  
cgacccccgccattgacgtcaataatgacgtatgtcccatagtaacgccaatagggactttcattgacgtcaatgggtggagtatt  
tacggtaactgccacttggcagtacatcaagtgtatcatatgccaaagcagccccattgacgtcaatgacggtaaatggcccgc  
ctggcattatgccagtagacattatgggactttcctacttggcagtagctacgtattatgctatgctattaccatgggtgatcgg  
tttggcagtagacatcaatgggctggatagcgggttgactcaggggattccaagtctccaccccattgacgtcaatgggagttgtt  
tggcaccaaaatcaacgggactttccaaaatgtcgtacaactccgccccattgacgcaaatgggcccgtggctgtacgggtggg  
aggtctatataagcagagctctccctatcagtgatagagatctccctatcagtgatagagatcgtcgcagagctcgtttagtgaaccg  
cagatcgcctggagacgccatccacgctgtttgacctcatagaagacacgggaccgatccagcctccggactctagcgtttaa  
acttaagcttggtagcagctcggatccactagctccagtgtggtggaattctgcagatatccagcacagtgggcggccgctcagac  
catgtaccatacagatgttctgactatgccggtaccgagctcggatccaccatggctagctggagccaccgcagttcgagaag  
gtggaggttccggaggtggatcgggaggtggatcgtggagccaccgcagttcgaanaagcggccgatcacaaagttgtacaa  
aaaagctgaacgagaacgtaaaatgatataaatcaatataatagattttgcataaaaaacagactacataatactgtaaaac  
acaacatatecagtcatttgaactttgacaaaaagcaggetccATGGCAGTGATGGAAATGGCCTGCCC  
AGGTGCCCCTGGCTCAGCAGTGGGGCAGCAGAAGGAACTCCCCAAAGCCAAG  
GAGAAGACGCCGCACTGGGGAAGAAACAGAGCTCCGTCTACAAGCTTGAGG  
CCGTGGAGAAGAGCCCTGTGTTCTGCGGAAAGTGGGAGATCCTGAATGACGTG  
ATTACCAAGGGCACAGCCAAGGAAGGCTCCGAGGCAGGGCCAGCTGCCATCTC  
TATCATCGCCCAGGCTGAGTGTGAGAATAGCCAAGAGTTCAGCCCCACCTTTTC  
AGAACGCATTTTCATCGCTGGGTCCAAACAGTACAGCCAGTCCGAGAGTCTTG  
ATCAGATCCCCAACAATGTGGCCCATGCTACAGAGGGCAAATGGCCCCGTGTG  
TGTTGGAAGGGAAAGCGTCGCAGCAAAGCCCGGAAGAAACGGAAGAAGA  
GCTCAAAGTCCCTGGCTCATGCAGGAGTGGCCTTGGCCAAACCCCTCCCCAGG  
ACCCCTGAGCAGGAGAGCTGCACCATCCCAGTGCAGGAGGATGAGTCTCCACT  
CGGCGCCCCATATGTTAGAAACACCCCGCAGTTCACCAAGCCTCTGAAGGAAC  
CAGGCCTTGGGCAACTCTGTTTTAAGCAGCTTGGCGAGGGCCTACGGCCGGCTC  
TGCCCTCGATCAGAACTCCACAACTGATCAGCCCCTTGCAATGTCTGAACCAG  
TGTGGAAACTGCACCACCCCGAGGACGGAGGCCCCCTGCCCTGCCACGCAC  
CCCTTCCCCTATAGCAGACTGCCTCATCCCTTCCCATTCCACCCTCTCCAGCCCT  
GGAAACCTCACCCCTCTGGAGTCCTTCTGGGCAAACCTGGCCTGTGTAGACAGCC  
AGAAACCCCTGCCTGACCCACACCTGAGCAAACCTGGCCTGTGTAGACAGTCCA  
AAGCCCCTGCCTGGCCACACCTGGAGCCCAGCTGCCTGTCTCGTGGTGCCCAT  
GAGAAGTTTTCTGTGGAGGAATACCTAGTGCATGCTCTGCAAGGCAGCGTGAG  
CTCAGGCCAGGCCACAGCCTGACCAGCCTGGCCAAGACCTGGGCAGCAAGGG  
GCTCCAGATCCCGGGAGCCAGCCCCAAAACCTGAGGACAACGAGGGTGTCTG  
CTCACTGAGAACTCAAGCCAGTGGATTATGAGTACCGAGAAGAAGTCCACTG  
GGCCACGCACCAGCTCCGCCTGGGACAGAGGCTCCTTCGGAGAGGTGCACAGGA  
TGGAGGACAAGCAGACTGGCTTCCAGTGCCTGTCAAAAAGGTGCGGCTGGAA  
GTATTTCCGGCAGAGGAGCTGATGGCATGTGCAGGATTGACCTCACCCAGAAT  
TGTCCCTTTGTATGGAGCTGTGAGAGAAGGGCCTTGGGTCAACATCTTCATGGA

GCTGCTGGAAGGTGGCTCCCTGGGCCAGCTGGTCAAGGAGCAGGGCTGTCTCC  
CAGAGGACCGGGCCCTGTACTACCTGGGCCAGGCCCTGGAGGGTCTGGAATAC  
CTCCACTCACGAAGGATTCTGCATGGGGACGTCAAAGCTGACAACGTGCTCCT  
GTCCAGCGATGGGAGCCACGCAGCCCTCTGTGACTTTGGCCATGCTGTGTGTCT  
TCAACCTGATGGCCTGGGAAAGTCCTTGCTCACAGGGGACTACATCCCTGGCA  
CAGAGACCCACATGGCTCCGGAGGTGGTGTCTGGGCAGGAGCTGCGACGCCAAG  
GTGGATGTCTGGAGCAGCTGCTGTATGATGCTGCACATGCTCAACGGCTGCCAC  
CCCTGGACTCAGTTCTTCCGAGGGCCGCTCTGCCTCAAGATTGCCAGCGAGCCT  
CCGCCTGTGAGGGAGATCCCACCCTCCTGCGCCCCTCTCACAGCCCAGGCCATC  
CAAGAGGGGCTGAGGAAAGAGCCCATCCACCGCGTGTCTGCAGCGGAGCTGG  
GAGGGAAGGTGAACCGGGCACTACAGCAAGTGGGAGGTCTGAAGAGCCCTTG  
GAGGGGAGAATATAAAGAACCAAGACATCCACCGCCAAATCAAGCCAATTAC  
CACCAGACCCTCCATGCCAGCCGAGAGAGCTTTCGCCAAGGGCCCCAGGGCC  
CCGGCCAGCTGAGGAGACAACAGGCAGAGCCCCTAAGCTCCAGCCTCCTCTCC  
CACCAGAGCCCCAGAGCCAAACAAGTCTCCTCCCTTGACTTTGAGCAAGGAG  
GAGTCTGGGATGTGGGAACCCTTACCTCTGTCTCCCTGGAGCCAGCCCCTGCC  
AGAAACCCAGCTCACCAGAGCGGAAAGCAACCGTCCCAGGAGCAGGAACTGC  
AGCAGCTGGAAATAGAATTATTCCTCAACAGCCTGTCCCAGCCATTTTCTCTGG  
AGGAGCAGGAGCAAATTCTCTCGTGCCTCAGCATCGACAGCCTCTCCCTGTCGG  
ATGACAGTGAGAAGAACCATCAAAGGCCTCTCAAAGCTCGCGGGACACCCTG  
AGCTCAGGCGTACACTCCTGGAGCAGCCAGGCCGAGGCTCGAAGCTCCAGCTG  
GAACATGGTGTCTGGCCCCGGGGGCGGCCACCGACACCCCAAGCTATTTCAATG  
GTGTGAAAGTCCAAATACAGTCTCTTAATGGTGAACACCTGCACATCCGGGAG  
TTCCACCGGGTCAAAGTGGGAGACATCGCCACTGGCATCAGCAGCCAGATCCC  
AGCTGCAGCCTTCAGCTTGGTGACCAAAGACGGGCAGCCTGTTTCGCTACGACA  
TGGAGGTGCCAGACTCGGGCATCGACCTGCAGTGCACACTGGCCCCTGATGGC  
AGCTTCGCTGGAGCTGGAGGGTCAAGCATGGCCAGCTGGAGAACAGGCCCTA  
Aaccagcttcatagtactggatatgtgtgttttacagcattatgtagtctgtttttatgcaaaatctaatttaatatattgatatttat  
cattttacgtttctcgttcagcttctgtacaaagtggtagcgttaagctagggggcccgtttaaacccgctgatcagcctcactgtgcct  
tctagttgccagccatctgtgtttgccctccccctgacctctgacctggaaggtgccactcccactgtcctttcctaataaaatg  
aggaaattgcatcgcatgtctgtagtaggtgtcattctattctggggggtgggggtggggcaggacagcaagggggaggattggga  
agacaatagcaggcatgctggggatgcggtgggctctatggcttctgaggcggaaagaaccagctggggctctagggggatccc  
ccacgcgcctgtagcggcgcatlaagcgcggcggtgtgtgtgttacgcgcagcgtgaccgctacactggcagcgccttagc  
gcccgtccttctcttcttcttcttcttctgcccacgttcgcccgttccccgtcaagctctaaatcgggggctccttttaggggttc  
cgatttagtgccttacggcacctcgaccccaaaaactgattaggggtgatggttcacgtacctagaagttcctattccgaagttcctatt  
ctctagaagtataggaactccttgcccaaaaagcctgaactcaccgcagcgtctgtcgagaagttctgatcgaaaagttcgaca  
gcgtctccgacctgatcagctctcggagggcgaaagaatctcgtgcttcagcttcgatgtaggagggcggtggatatgtctcggg  
gtaaatagctgcgccgatggtttctacaaagatcgttatgtttatcggcactttgcatcgccgcgctcccattccggaagtgtga  
cattgggggaattcagcgagagcctgacctattgcatctcccgcctgcacagggtgtcacgttgcaagacctgcctgaaaccgaac  
tgcccgtgttctgcagccggtcgcggaggccatggatgcgatcgtcgcggccgatcttagccagacgagcgggttcggcccatt  
cggaccgcaaggaatcggtcaatacactacatggcgtgattcatatgcgcgattgctgatccccatgtgtatcactggcaactgtg  
atggacgacaccgtcagtcgctcgcgcaggctctcgtatgagctgatgctttggggcaggactgccccgaagtccggcacc  
ctgtgcacgcggatttcggctccaacaatgtcctgacggacaatggccgcataacagcggctcattgactggagcagggcgatgttc

ggggattccaatacagaggtcgccaacatcttcttctggagccgtgggtggcttgatggagcagcagacgcgctacttcgagcg  
gaggcatccggagcttgaggatcgccgcggctccgggcgtatatgctccgcatggcttgaccaactctatcagagcttggtga  
cggcaatttcgatgatgcagcttgggcgcagggctgatgcagcgaatcgtccgatccggagccgggactgtcgggcgtacaca  
aatcggccgcagaagcgcggccgtctggaccgatggctgtgtagaagtactcgccgatagtgaaaccgacgccccagcactcg  
tccgagggcaaaggaatgacgactacgagatttcgattccaccgccccttctatgaaaggtgggcttcggaatcgtttccgg  
gacgcccggctggatgatcctccagcgcggggatctcatgctggagttctcggccaccaactgtttattgcagcttataatggtta  
caaataaagcaatagcatcacaaatttcacaaataaagcatttttctactgcattctagtgtggtttgtccaaactcatcaatgatcttat  
catgtctgtataaccgtcgacctctagctagagcttggcgtaatcatggctcatagctgttctctgtgtgaaattgtatccgctcacaattcc  
acacaacatacagaccggaagcataaagtgtaaagcctgggggtgctaagtgtgagcctaactcacattaattgcgttgcgctcact  
gcccgtttccagtcgggaaacctgtcgtccagctgcattaatgaatcgccaacgcgcggggagagggcggtttgcgtattggg  
cgctctccgcttctcgtcactgactcgtcgcctcggtcgttcggctgcggcgagcggtatcagctcactcaaaggcggtata  
cggttatccacagaatcaggggataacgcaggaagaacatgtgagcaaaaggccagcaaaaggccaggaacctgaaaaagg  
ccgctgtgctggcggttttccataggctccgccccctgacgagcatcacaaaaatcgacgctcaagtcagaggtggcgaaaccg  
acaggactataaagataaccaggcggtttcccctggaagctccctcgtcgcctcctgttccgacctgcccgttaccggatacctgt  
ccgcttttcccttcgggaagcgtggcgctttctcatagctcacgctgtaggtatctcagttcgggtgtaggtcgttcgctccaagctg  
ggctgtgtgcacgaacccccgttaccggaccgctgcgccttaccggtaactatcgtcttgagccaacccgtaagacacga  
cttaccgactggcagcagccactggtaacaggattagcagagcgaggtatgtaggcggtgtacagagttcttgaagtgtggc  
ctaactacggctacactagaagaacagtatttgatctcgcctcgtcgaagccagttaccttcggaaaaagagttgtagctcttga  
tccggcaaaaccaccgctggtagcgggtggtttttgttgcaagcagcagattacgcgcagaaaaaaggatctcaagaagat  
cctttgatctttctacggggtctgacgctcagtggaacgaaaactcacgtaagggtttggtcatgagattcaaaaaaggatcttc  
acctagatccttttaataaaaaatgaagtttaaatcaatctaaagtatatatagtaaaacttggtctgacagttaccaatgcttaacagt  
gaggcacctatctcagcgatctgtctatttcgttccatcatagttgctgactccccgctgtagataactacgatacgggagggctta  
ccatctggccccagtgctgcaatgataccgcgagaccacgctcaccggctccagattatcagcaataaaccagccagccggaa  
gggcccagcgcagaagtggtcctgcaactttatccgctccatccagcttataaattgttccggggaagctagagtaagtagttcgc  
agttaatagtttgcgcaacgttgttgcattgctacaggcatcgtgggtgcagctcgtcgtttggtatggcttcattcagctccggtcc  
caacgatcaaggcgagttacatgatccccatggttgcaaaaaagcggttagctccttcggctcctcgatcgttgcagaagtaagt  
tggccgcagtggtatcactcatggttatggcagcactgcataattcttactgtcatgccatccgtaagatgcttttctgtgactggtga  
gtactcaaccaagtcattctgagaatagtgatgcggcgaccgagttgctcttgcggcgtaatacgggataataaccgcccaca  
tagcagaactttaaagtgtcatcattggaaaacgttctcggggcgaaaactctcaaggatcttaccgctgttgagatccagttcga  
tgaacccactcgtgacccaactgatcttcagatcttttaccagcgtttctgggtgagcaaaaaacaggaaggcaaaatgcc  
gcaaaaaagggaataaggcgacacggaaatgtgaactcactcttcttttcaatattattgaagcatttatcagggttattgtc  
tcatgagcggatacatatttgaatgtatttagaaaaataaacaataaggggtccgcgcacatttccccgaaaagtgccacctgacgt  
c

pTO-SII-HA-GW (NIK-K429A/K430A N terminal)

gacggatcgggagatctcccgatcccctatggtgcactctcagtacaactctgctctgatgccgcatagttaagccagtatctgctccct  
gcttgtgtgtggaggtcgtgagtagtgcgcgagcaaaathtaagctacaacaaggcaaggcttgaccgacaattgcatgaagaat  
ctgcttagggtaggcgttttgcgctgcttcgcatgtacgggcccagatatacgcgttgacattgattgactagttattaatagtaat  
caattacggggtcattagttcatagcccataatgaggttccgcgttacataacttacggtaaatggcccgcctggctgaccgccc  
cgacccccgccattgacgtcaataatgacgtatgtcccatagtaacgccaatagggactttcattgacgtcaatgggtggagtatt  
tacggtaactgccacttggcagtacatcaagtgtatcatatgccaaagtagcggccctattgacgtcaatgacggtaaatggcccgc  
ctggcattatgccagtagacattatgggactttcctacttggcagtagctacgtattatgctattaccatgggtgatgcgg  
tttggcagtagcatcaatgggctggatagcgggttactcaggggattccaagtctccaccccattgacgtcaatgggagttgttt  
tggcaccaaaatcaacgggactttccaaaatgtcgtacaactccgcccattgacgcaaatgggaggtaggcgtgtacgggtggg  
aggtctatataagcagagctctccctatcagtgatagagatctccctatcagtgatagagatcgtcgcagagctcgtttagtgaacct  
cagatcgcctggagacgccatccacgctgtttgacctcatagaagacacgggaccgatccagcctccggactctagcgtttaa  
acttaagcttggtagcagctcggatccactagctccagtgtggtggaattctgcagatatccagcacagtggcggccgctcagac  
catgtaccatacagatgttctgactatgccggtaccgagctcggatccaccatggctagctggagccaccgcagttcgagaag  
gtggaggttccggaggtggatcgggaggtggatcgtggagccaccgcagttcgaanaagcggccgatcacaaagttgtacaa  
aaaagcaggtccATGGCAGTGATGGAATGGCCTGCCAGGTGCCCTGGCTCAGCA  
GTGGGGCAGCAGAAGGAACTCCCCAAAGCCAAGGAGAAGACGCCGCCACTGG  
GGAAGAAACAGAGCTCCGTCTACAAGCTTGAGGCCGTGGAGAAGAGCCCTGTG  
TTCTGCGGAAAGTGGGAGATCCTGAATGACGTGATTACCAAGGGCACAGCCAA  
GGAAGGCTCCGAGGCAGGGCCAGCTGCCATCTCTATCATCGCCCAGGCTGAGT  
GTGAGAATAGCCAAGAGTTCAGCCCCACCTTTTCAGAACGCATTTTCATCGCTG  
GGTCCAAACAGTACAGCCAGTCCGAGAGTCTTGATCAGATCCCCAACAAATGTG  
GCCATGCTACAGAGGGCAAATGGCCCGTGTGTGTTGGAAGGGAAAGCGTGC  
CAGCAAAGCCCGGAAGAAACGGAAGAAGAAGAGCTCAAAGTCCCTGGCTCAT  
GCAGGAGTGGCCTTGCCAAACCCCTCCCCAGGACCCCTGAGCAGGAGAGCTG  
CACCATCCCAGTGCAGGAGGATGAGTCTCCACTCGGCGCCCCATATGTTAGAA  
ACACCCCGCAGTTCACCAAGCCTCTGAAGGAACCAGGCCTTGGGCAACTCTGT  
TTAAGCAGCTTGCGAGGGCCTACGGCCGGCTCTGCCTCGATCAGAACTCCAC  
AAACTGATCAGCCCCTTGCAATGTCTGAACCACGTGTGGAAACTGCACCACCC  
CCAGGACGGAGGCCCCCTGCCCTGCCACGCACCCCTTCCCCTATAGCAGACT  
GCCTCATCCCTTCCCATTCCACCCTCTCCAGCCCTGGAAACCTCACCCCTCTGGA  
GTCTTCTTGGGCAAACCTGGCCTGTGTAGACAGCCAGAAACCCTTGCCTGACCC  
ACACCTGAGCAAACCTGGCCTGTGTAGACAGTCCAAAGCCCCTGCCTGGCCCAC  
ACCTGGAGCCCAGCTGCCTGTCTCGTGGTGCCCATGAGAAGTTTTCTGTGGAGG  
AATACCTAGTGCATGCTCTGCAAGGCAGCGTGAGCTCAGGCCAGGCCACAGC  
CTGACCAGCCTGGCCAAGACCTGGGCAGCAAGGGGCTCCAGATCCCGGGAGCC  
CAGCCCCAAAACCTGAGGACAACGAGGGTGTCTCTGCTCACTGAGAACTCAAGC  
CAGTGGATTATGAGTACCGAGAAGAAGTCCACTGGGCCACGCACCAGCTCCGC  
CTGGGCAGAGGCTCCTTCGGAGAGGTGCACAGGATGGAGGACAAGCAGACTG  
GCTTCCAGTGCCTGTCTCGCAGCGGTGCGGCTGGAAGTATTTCCGGCAGAGGAG  
CTGATGGCATGTGCAGGATTGACCTACCCAGAATTGTCCCTTTGTATGGAGCT  
GTGAGAGAAGGGCCTTGGGTCAACATCTTCATGGAGCTGCTGGAAGGTGGCTC  
CCTGGGCCAGCTGGTCAAGGAGCAGGGCTGTCTCCAGAGGACCGGGCCCTGT



gacgcaatcgatccggagccgggactgtcgggctacacaaatgccccgcagaagcgggctctggaccgatggctg  
ttagaagctactgccgatagtggaaaccgacgccccagcactcgtccgaggcgaaggaatagcacgtactacgagattcgatt  
ccaccgccctctatgaaaggtgggcttcggaatcgtttccgggacgccggctggatgatcctccagcgcggggatctcatg  
tggagttctcggccacccaactgtttattgcagctataatggttacaataaagcaatagcatcacaatttcacaataaagcatt  
ttttactgcattctagttgtggtttgcacaaactcaatgatcttatcatgtctgtataaccgtcgacctctagctagacttggcgtaa  
tcatggatcatagctgttctgtgtgaaattgttatccgctcacaattccacacaacatacagccggaagcataaagtgtaaagcctg  
gggtgcctaagtagtgagtaactcacattaattgcgttgcgctcactgcccgtttccagtcgggaaacctgctggtccagctgcatt  
aatgaatcgccaacgcgcggggagaggcgggttgcgtattgggctcctccgcttctcgtcactgactcgtcgcctcggctc  
gttcggctgcggcagcggatcagctcactcaaggcggtaatacggttatccacagaatcaggggataacgcaggaaagaac  
atgtgagcaaaaaggccagcaaaaaggccaggaaccgtaaaaaggccgcgttgcgtggcgttttccataggctccgccccctgacg  
agcatcacaataatcgacgctcaagtcagaggtggcgaaccgacaggactataaagataaccaggcgtttccccctggaagctc  
cctcgtgcgctcctgttccgacctgcccgttaccggatactgtccgcttttccctcgggaagcgtggcgcttctcatagctc  
acgctgtaggtatcagttcggtgtaggtcgttcgctccaagctgggctgtgtgcacgaacccccggtcagccccaccgctgcgc  
cttatccggtaactatcgtcttgagtccaaccggtaagacacgacttatgccactggcagcagccactggtaacaggattagcag  
agcgaggtatgtaggcggtgtacagagttctgaagtggtggcctaactacggctacactagaagaacagatttggatctgcgct  
ctgctgaagccagttacctcggaaaaagagttgtagctcttgatccggcaacaaaccaccgctggtagcgggtggtttttgttg  
caagcagcagattacgcgcagaaaaaaggatctcaagaagatcctttgatctttctacggggtctgacgctcagtggaacgaaaa  
ctcacgttaagggtttggtcatgagattatcaaaaaggatcttccactagatccttttaataaaaaatgaagtttaaatcaatctaaa  
gtatataatgagtaaaacttggctgacagttaccaatgcttaacagtgaggcacctatctcagcgatctgtctattcgttcatccatagtt  
gcctgactccccgctgctgtagataactacgatacgggagggcttaccatctggccccagtgctgcaatgataaccgcgagaccacg  
ctcaccggctccagattatcagcaataaaccagccagccggaaggccgagcgcagaagtggtcctgcaactttatccgctcca  
tccagctctattaattgttccgggaagctagagtaagtagttcggcagtaatagtttgcgaacgttgttgcattgctacaggtcag  
tgggtcacgctcgtcgttggtaggtcattcagctccggtcccaacgatcaaggcaggttacatgatccccatgttgtgcaaa  
aaagcggtagctcctcggctcctccgatcgttgcagaagtaagttggccgagtggtatcactcatggttatggcagcactgcataa  
ttctctactgtcatgccatccgtaagatgctttctgtgactgggtgagtactcaaccaagtcattctgagaatagtgtagcggcgaccg  
agttgctcttcccggcgtcaatacgggataataccgcgccacatagcagaactttaaagtgctcatattggaaaacgttctcgg  
ggcgaaaactctcaaggatcttaccgctgttgagatccagttcagatgtaaccactcgtgcaccaactgatcttcagcatctttacttt  
caccagcgtttctgggtgagcaaaaaacaggaaggcaaaatgccgcaaaaaagggaataaggcgacacggaaatgttgaatact  
catactctccttttcaatattattgaagcattatcagggtattgtctcatgagcggatacatattgaaatgtattgaaaaataaaca  
ataggggtccgcgacatttccccgaaaagtgccacctgacgctc



pTO-SII-HA-GW (NIK-P565R N terminal)

gacggatcgggagatctcccgatcccctatgggtcactctcagtaacaatctgctctgatgccgcataagccaagcagtatctgctccct  
gctgtgtgtggaggtcgtgagtagtgcgcgagcaaaatctaagctacaacaaggcaaggcttgaccgacaattgcatgaagaat  
ctgcttagggtaggcgttttgcgctgcttcgcgatgtacgggcccagatatacgcgttgacattgattgactagttattaatagtaat  
caattacggggtcattagttcatagcccataatggagttccgcgttacataacttacggtaaatggcccgcctggctgaccgccc  
cgacccccgccattgacgtcaataatgacgtatgtcccatagtaacgccaatagggactttcattgacgtcaatgggtggagtatt  
tacggtaactgccacttggcagtacatcaagtgtatcatatgccaaagtagcggccctattgacgtcaatgacggtaaatggcccgc  
ctggcattatgccagtagacattatgggactttcctacttggcagtagctacgtattatgctattaccatgggtgatgcgg  
tttggcagtagatcaatgggctggatagcgggttgcactacggggtttccaagtctccacccattgacgtcaatgggagttgttt  
tggcaccaaaatcaacgggactttccaaaatgtcgtacaactccgcccattgacgcaaatgggaggtaggcgtgtacgggtggg  
aggtctatataagcagagctctccctatcagtgatagagatctccctatcagtgatagagatcgtcgcagagctcgtttagtgaacct  
cagatcgcctggagacgccatccacgtgtttgacctcatagaagacaccgggaccgatccagcctccggactctagcgtttaa  
acttaagcttggtagcagctcggatccactagtcagtggtggaattctgcagatccagcagagtgaggcggcgtcgcagac  
catgtaccatacagatgttctgactatgccggtaccgagctcggatccaccatggctagctggagccaccgcagttcgagaag  
gtggaggttccggaggtggatcgggaggtggatcgtggagccaccgcagttcgaanaagcggccgatcacaaagttgtacaa  
aaaagctgaacgagaacgtaaaatgatataaatcaatataatagattttgcataaaaaacagactacataatactgtaaaac  
acaacatatecagtcatttgaactttgacaaaaagcaggtccATGGCAGTGATGGAAATGGCCTGCCC  
AGGTGCCCCTGGCTCAGCAGTGGGGCAGCAGAAGGAACTCCCCAAAGCCAAG  
GAGAAGACGCCGCACTGGGGAAGAAACAGAGCTCCGTCTACAAGCTTGAGG  
CCGTGGAGAAGAGCCCTGTGTTCTGCGGAAAGTGGGAGATCCTGAATGACGTG  
ATTACCAAGGGCACAGCCAAGGAAGGCTCCGAGGCAGGGCCAGCTGCCATCTC  
TATCATCGCCCAGGCTGAGTGTGAGAATAGCCAAGAGTTCAGCCCCACCTTTTC  
AGAACGCATTTTCATCGCTGGGTCCAAACAGTACAGCCAGTCCGAGAGTCTTG  
ATCAGATCCCCAACAATGTGGCCCATGCTACAGAGGGCAAATGGCCCGTGTG  
TGTTGGAAGGGAAAGCGTCGCAGCAAAGCCCGGAAGAAACGGAAGAAGA  
GCTCAAAGTCCCTGGCTCATGCAGGAGTGGCCTTGGCCAAACCCCTCCCCAGG  
ACCCCTGAGCAGGAGAGCTGCACCATCCCAGTGCAGGAGGATGAGTCTCCACT  
CGGCGCCCCATATGTTAGAAACACCCCGCAGTTCACCAAGCCTCTGAAGGAAC  
CAGGCCTTGGGCAACTCTGTTTTAAGCAGCTTGGCGAGGGCCTACGGCCGGCTC  
TGCTCGATCAGAACTCCACAACTGATCAGCCCCTTGCAATGTCTGAACCAG  
TGTGGAAACTGCACCACCCCGAGGACGGAGGCCCCCTGCCCTGCCACGCAC  
CCCTTCCCCTATAGCAGACTGCCTCATCCCTTCCCATTCCACCCTCTCCAGCCCT  
GGAAACCTCACCCCTCTGGAGTCCTTCTGGGCAAACCTGGCCTGTGTAGACAGCC  
AGAAACCCCTGCCTGACCCACACCTGAGCAAACCTGGCCTGTGTAGACAGTCCA  
AAGCCCCTGCCTGGCCACACCTGGAGCCCAGCTGCCTGTCTCGTGGTGCCCAT  
GAGAAGTTTTCTGTGGAGGAATACCTAGTGCATGCTCTGCAAGGCAGCGTGAG  
CTCAGGCCAGGCCACAGCCTGACCAGCCTGGCCAAGACCTGGGCAGCAAGGG  
GCTCCAGATCCCGGGAGCCAGCCCCAAACTGAGGACAACGAGGGTGTCTG  
CTCACTGAGAACTCAAGCCAGTGGATTATGAGTACCGAGAAGAAGTCCACTG  
GGCCACGCACCAGCTCCGCCTGGGCAGAGGCTCCTTCGGAGAGGTGCACAGGA  
TGGAGGACAAGCAGACTGGCTTCCAGTGCCTGTCAAAAAGGTGCGGCTGGAA  
GTATTTCCGGCAGAGGAGCTGATGGCATGTGCAGGATTGACCTCACCCAGAAT  
TGTCCCTTTGTATGGAGCTGTGAGAGAAGGGCCTTGGGTCAACATCTTCATGGA

GCTGCTGGAAGGTGGCTCCCTGGGCCAGCTGGTCAAGGAGCAGGGCTGTCTCC  
CAGAGGACCGGGCCCTGTACTACCTGGGCCAGGCCCTGGAGGGTCTGGAATAC  
CTCCACTCACGAAGGATTCTGCATGGGGACGTCAAAGCTGACAACGTGCTCCT  
GTCCAGCGATGGGAGCCACGCAGCCCTCTGTGACTTTGGCCATGCTGTGTGTCT  
TCAACCTGATGGCCTGGGAAAGTCCTTGCTCACAGGGGACTACATCCCTGGCA  
CAGAGACCCACATGGCTCGGGAGGTGGTGTCTGGGCAGGAGCTGCGACGCCAA  
GGTGGATGTCTGGAGCAGCTGCTGTATGATGCTGCACATGCTCAACGGCTGCC  
ACCCCTGGACTCAGTTCTTCCGAGGGCCGCTCTGCCTCAAGATTGCCAGCGAGC  
CTCCGCCTGTGAGGGAGATCCCACCCTCCTGCGCCCCTCTCACAGCCCAGGCCA  
TCCAAGAGGGGCTGAGGAAAGAGCCCATCCACCGCGTGTCTGCAGCGGAGCTG  
GGAGGGGAAGGTGAACCGGGCACTACAGCAAGTGGGAGGTCTGAAGAGCCCTT  
GGAGGGGAGAATATAAAGAACCAAGACATCCACCGCCAAATCAAGCCAATTA  
CCACCAGACCCTCCATGCCAGCCGAGAGAGCTTTCGCCAAGGGCCCCAGGGC  
CCCGGCCAGCTGAGGAGACAACAGGCAGAGCCCCTAAGCTCCAGCCTCCTCTC  
CCACCAGAGCCCCAGAGCCAAACAAGTCTCCTCCCTTGACTTTGAGCAAGGA  
GGAGTCTGGGATGTGGGAACCTTACCTCTGTCCTCCCTGGAGCCAGCCCCTGC  
CAGAAACCCAGCTCACCAGAGCGGAAAGCAACCGTCCCGGAGCAGGAACTG  
CAGCAGCTGGAAATAGAATTATTCCTCAACAGCCTGTCCCAGCCATTTTCTCTG  
GAGGAGCAGGAGCAAATTCTCTCGTGCCTCAGCATCGACAGCCTCTCCCTGTCTG  
GATGACAGTGAGAAGAACCCATCAAAGGCCTCTCAAAGCTCGCGGGACACCCT  
GAGCTCAGGCGTACACTCCTGGAGCAGCCAGGCCGAGGCTCGAAGCTCCAGCT  
GGAACATGGTGTCTGGCCCAGGGGCGGCCACCACCCCAAGCTATTTCAAT  
GGTGTGAAAGTCCAAATACAGTCTCTTAATGGTGAACACCTGCACATCCGGGA  
GTTCCACCGGGTCAAAGTGGGAGACATCGCCACTGGCATCAGCAGCCAGATCC  
CAGCTGCAGCCTTCAGCTTGGTGACCAAGACGGGCAGCCTGTTCGCTACGAC  
ATGGAGGTGCCAGACTCGGGCATCGACCTGCAGTGCACACTGGCCCCTGATGG  
CAGCTTCGCCTGGAGCTGGAGGGTCAAGCATGGCCAGCTGGAGAACAGGCCCT  
AAaccagctttcatagtgactggatatgtgtgtttacagcattatgtagtctgtttttatgcaaaatctaatttaatatattgatattat  
atcattttacgtttctcgttcagctttctgtacaaagtggtagcgttaagctaggggcccgtttaaccgctgatcagcctcgactgtgc  
cttctagtggcagccatctgtttgttggcccctccccgtgecttcttaccctggaaggtgcccactcccactgtcctttctaataaaa  
tgaggaaattgcatcgcattgtctgagtaggtgtcattctattctggggggtgggggtggggcaggacagcaagggggaggattggg  
aagacaatagcaggcatgctgggatgctgggtggctctatggcttctgagggcgaaagaaccagctggggctctagggggatc  
cccacgcgcctgtageggcgattaagcgcggcggtgtggtggttacgcgcagcgtgaccgtacacttgccagcgccttag  
cgcccgtcctttcgtttcttcccttcttctcgcacagttcgcggcttccccgtcaagctctaaatcgggggctccttttaggggt  
ccgatttagtgctttacggcacctcgaccccaaaaacttgattaggggtgatggttcacgtacctagaagttcctattccgaagttccta  
ttctctagaaagtataggaactccttgccaaaaagcctgaactcaccgcagcgtctgtcgagaagttctgatgaaaagttcgac  
agcgtctccgacctgatgcagctctcggagggcgaaagaatctcgtgctttcagcttcgatgtaggagggcgtggatattgtcctgccc  
gtaaatagctgcgccgatggtttctacaaagatcgttatggttatcggcactttgcatcgccgcgctcccattccggaagtgttga  
cattgggggaattcagcgagagcctgacctattgcatctcccgcctgcacaggggtgcacgttgcaagacctgcctgaaaccgaac  
tgcccgtgttctgagccggtcgcggaggccatggatgcgatcgtcgcggccgatcttagccagacgagcgggttcggcccatt  
cggaccgcaaggaatcggtaatacactacatggcgtgattcatatgcgcgattgctgatccccatgtgtatcactggcaactgtg  
atggacgacaccgtcagtcgctcgcgcaggctctcgtatgagctgatgctttggggcaggactccccgaagtccggcacc  
ctgtgcacgcggatttcggctccaacaatgtcctgacggacaatggccgcataacagcggctcattgactggagcagggcgtgctt

ggggattccaatacagaggtcgccaacatcttcttctggagccgtgggtggcttgatggagcagcagacgcgctacttcgagcg  
gaggcatccggagcttgaggatcgccgcggctccgggcgtatatgctccgcatggcttgaccaactctatcagagcttggtga  
cggcaatttcgatgatgcagcttgggcgcagggctgatgcagcgaatcgctccgatccggagccgggactgtcgggcgtacaca  
aatcggccgcagaagcgcggccgtctggaccgatggctgtgtagaagtactgccgatagtgaaaccgacgccccagcactcg  
tccgagggcaaaggaatgacgactactagagattcgattccaccgccccttctatgaaaggtgggcttcggaatcgtttccgg  
gacgcccggctggatgatcctccagcgcggggatctcatgctggagttctcggccacccaactgtttattgcagcttataatggtta  
caaataaagcaatagcatcacaaattcacaaataaagcatttttctactgcattctagtgtggtttgtccaaactcatcaatgatcttat  
catgtctgtataaccgtcgacctctagctagagcttggcgtaatcatggctatagctgttctctgtgtgaaattgtatccgctcacaattcc  
acacaacatacagaccggaagcataaagttaaagcctgggggtgctaataagtgagcctaactcacattaattgcgttgcgctcact  
gcccgtttccagtcgggaaacctgtcgtccagctgcattaatgaatcgccaacgcgcggggagaggcggttgcgtattggg  
cgctctccgcttctcctcactgactcgtcgcctcggcttccgctgcggcgagcggtatcagctcactcaaggcggttaata  
cggttatccacagaatcaggggataacgcaggaagaacatgtgagcaaaaggccagcaaaaggccaggaacctgaaaaagg  
ccgctgtgctggcggttttccataggctccgccccctgacgagcatcacaaaaatcgacgctcaagtcagaggtggcgaaaccg  
acaggactataaagataaccaggcggtttcccctggaagctccctcgtcgcctcctgttccgacctgcccgttaccggatacctgt  
ccgcttttcccttcgggaaagcgtggcgcttttctcatagctcacgctgtaggtatctcagttcgggtgtaggtcgttcccaagctg  
ggctgtgtgcacgaacccccgttaccggaccgctgcgccttaccggtaactatcgtcttgagccaacccggtaagacacga  
cttaccgactggcagcagccactggtaacaggattagcagagcgaggtatgtaggcggtgtacagagttcttgaagtgggtggc  
ctaactacggctacactagaagaacagtatttggtatctcgcctcgtcgaagccagttaccttcggaaaaagagttggtagctctga  
tccggcaaaacaccgctggttagcgggtggtttttgttgcaagcagcagattacgcgcagaaaaaaggatctcaagaagat  
cctttgatcttttctacggggtctgacgctcagtggaacgaaaactcacgtaagggttttggctatgagattcaaaaaaggatcttc  
acctagatccttttaataaaaaatgaagtttaaatcaatctaaagtatatatagtaaaacttggtctgacagttaccaatgcttaacagt  
gaggcacctatctcagcgatctgtctatttcgttccatcatagttgctgactccccgctgtagataactacgatacgggagggctta  
ccatctggccccagtgctgcaatgataccgcgagaccacgctcaccggctccagattatcagcaataaaccagccagccggaa  
gggcccagcgcagaagtggtcctgcaactttatccgctccatccagcttataaattgttccggggaagctagagtaagtagttcgc  
agttaatagtttgcgcaacgttgttgcattgctacaggcatcgtgggtgcagctcgtcgtttggtatggcttcattcagctccggtcc  
caacgatcaaggcgagttacatgatccccatgttggtgcaaaaaagcggttagctccttcggctcctccgatcgttgcagaagtaagt  
tggccgcagtggtatcactcatggttatggcagcactgcataattcttactgtcatgccatccgtaagatgcttttctgtgactggtga  
gtactcaaccaagtcattctgagaatagtgatgcggcgaccgagttgctcttggccggcgtcaatacgggataataaccgcgccaca  
tagcagaactttaaagtgtcatcattggaaaacgttctcggggcgaaaactctcaaggatcttaccgctgttgagatccagttcga  
tgaacccactcgtgcaccaactgatcttcagatcttttaccagcgtttctgggtgagcaaaaaacaggaaggcaaaatgcc  
gcaaaaaagggaataaggcgacacggaaatgttgaactcactcttcttttcaatattattgaagcatttatcagggttattgtc  
tcatgagcggatacatatttgaatgtatttagaaaaataaacaataaggggttccgcgcacatttccccgaaaagtgccacctgacgt  
c

pTO-SII-HA-GW (NIK-G860R N terminal)

gacggatcgggagatctcccgatcccctatgggtcactctcagtaacaatctgctctgatgccgcataagccaagcagtatctgctccct  
gctgtgtgtggaggtcgtgagtagtgcgcgagcaaaatctaagctacaacaaggcaaggcttgaccgacaattgcatgaagaat  
ctgcttagggtaggcgttttgcgctgcttcgcatgtacgggcccagatatacgcgttgacattgattgactagttattaatagtaat  
caattacggggtcattagttcatagcccataatggagttccgcgttacataacttacggtaaatggcccgcctggctgaccgccc  
cgacccccgccattgacgtcaataatgacgtatgtcccatagtaacgccaatagggactttccattgacgtcaatgggtggagtatt  
tacggtaactgccacttggcagtacatcaagtgtatcatatgccaaagcagccccattgacgtcaatgacggtaaatggcccgc  
ctggcattatgccagtagacattatgggactttcctacttggcagtagctacgtattatgctattaccatgggtgatcggg  
tttggcagtagatcaatggggtgtagcgggttgactcaggggatttccaagtctccaccccattgacgtcaatgggagttgttt  
tggcaccaaaatcaacgggactttccaaaatgtcgtacaactccgccccattgacgcaaatgggcggtaggcgtgtacgggtggg  
aggtctatataagcagagctctccctatcagtgatagagatctccctatcagtgatagagatcgtcgcagagctcgtttagtgaacct  
cagatcgcctggagacgccatccacgtgtttgacctcatagaagacaccgggaccgatccagcctccggactctagcgtttaa  
acttaagcttggtagcagctcggatccactagtcagtggtggaattctgcagatatccagcacagtgggcgccgctcagac  
catgtaccatacagatgttctgactatgccggtaccgagctcggatccaccatggctagctggagccaccgcagttcgagaag  
gtggaggttccggaggtggatcgggaggtggatcgtggagccaccgcagttcgaanaagcggccgatcacaaagttgtacaa  
aaaagctgaacgagaacgtaaaatgatataaatcaatataatagattttgcataaaaaacagactacataatactgtaaaac  
acaacatatecagtcataatgaactttgtacaaaaagcaggtccATGGCAGTGATGGAAATGGCCTGCCC  
AGGTGCCCCTGGCTCAGCAGTGGGGCAGCAGAAGGAACTCCCCAAAGCCAAG  
GAGAAGACGCCGCACTGGGGAAGAAACAGAGCTCCGTCTACAAGCTTGAGG  
CCGTGGAGAAGAGCCCTGTGTTCTGCGGAAAGTGGGAGATCCTGAATGACGTG  
ATTACCAAGGGCACAGCCAAGGAAGGCTCCGAGGCAGGGCCAGCTGCCATCTC  
TATCATCGCCCAGGCTGAGTGTGAGAATAGCCAAGAGTTCAGCCCCACCTTTTC  
AGAACGCATTTTCATCGCTGGGTCCAAACAGTACAGCCAGTCCGAGAGTCTTG  
ATCAGATCCCCAACAATGTGGCCCATGCTACAGAGGGCAAATGGCCCGTGTG  
TGTTGGAAGGGAAAGCGTCGCAGCAAAGCCCGGAAGAAACGGAAGAAGA  
GCTCAAAGTCCCTGGCTCATGCAGGAGTGGCCTTGGCCAAACCCCTCCCCAGG  
ACCCCTGAGCAGGAGAGCTGCACCATCCCAGTGCAGGAGGATGAGTCTCCACT  
CGGCGCCCCATATGTTAGAAACACCCCGCAGTTCACCAAGCCTCTGAAGGAAC  
CAGGCCTTGGGCAACTCTGTTTTAAGCAGCTTGGCGAGGGCCTACGGCCGGCTC  
TGCTCGATCAGAACTCCACAACTGATCAGCCCCTTGCAATGTCTGAACCAG  
TGTGGAAGTGCACCACCCCGAGGACGGAGGCCCCCTGCCCTGCCACGCAC  
CCCTTCCCCTATAGCAGACTGCCTCATCCCTTCCCATTCCACCCTCTCCAGCCCT  
GGAAACCTCACCCCTCTGGAGTCCTTCTGGGCAAACCTGGCCTGTGTAGACAGCC  
AGAAACCCCTGCCTGACCCACACCTGAGCAAACCTGGCCTGTGTAGACAGTCCA  
AAGCCCCTGCCTGGCCACACCTGGAGCCCAGCTGCCTGTCTCGTGGTGCCCAT  
GAGAAGTTTTCTGTGGAGGAATACCTAGTGCATGCTCTGCAAGGCAGCGTGAG  
CTCAGGCCAGGCCACAGCCTGACCAGCCTGGCCAAGACCTGGGCAGCAAGGG  
GCTCCAGATCCCGGGAGCCAGCCCCAAAACCTGAGGACAACGAGGGTGTCTG  
CTCACTGAGAACTCAAGCCAGTGGATTATGAGTACCGAGAAGAAGTCCACTG  
GGCCACGCACCAGCTCCGCCTGGGCAGAGGCTCCTTCGGAGAGGTGCACAGGA  
TGAGGACAAGCAGACTGGCTTCCAGTGCCTGTCAAAAAGGTGCGGCTGGAA  
GTATTTCCGGCAGAGGAGCTGATGGCATGTGCAGGATTGACCTCACCCAGAAT  
TGTCCCTTTGTATGGAGCTGTGAGAGAAGGGCCTTGGGTCAACATCTTCATGGA

GCTGCTGGAAGGTGGCTCCCTGGGCCAGCTGGTCAAGGAGCAGGGCTGTCTCC  
CAGAGGACCGGGCCCTGTACTACCTGGGCCAGGCCCTGGAGGGTCTGGAATAC  
CTCCACTCACGAAGGATTCTGCATGGGGACGTCAAAGCTGACAACGTGCTCCT  
GTCCAGCGATGGGAGCCACGCAGCCCTCTGTGACTTTGGCCATGCTGTGTGTCT  
TCAACCTGATGGCCTGGGAAAGTCCTTGCTCACAGGGGACTACATCCCTGGCA  
CAGAGACCCACATGGCTCCGGAGGTGGTGTCTGGGCAGGAGCTGCGACGCCAAG  
GTGGATGTCTGGAGCAGCTGCTGTATGATGCTGCACATGCTCAACGGCTGCCAC  
CCCTGGACTCAGTTCTTCCGAGGGCCGCTCTGCCTCAAGATTGCCAGCGAGCCT  
CCGCCTGTGAGGGAGATCCCACCCTCCTGCGCCCCTCTCACAGCCCAGGCCATC  
CAAGAGGGGCTGAGGAAAGAGCCCATCCACCGCGTGTCTGCAGCGGAGCTGG  
GAGGGAAGGTGAACCGGGCACTACAGCAAGTGGGAGGTCTGAAGAGCCCTTG  
GAGGGGAGAATATAAAGAACCAAGACATCCACCGCCAAATCAAGCCAATTAC  
CACCAGACCCTCCATGCCAGCCGAGAGAGCTTTCGCCAAGGGCCCCAGGGCC  
CCGGCCAGCTGAGGAGACAACAGGCAGAGCCCCTAAGCTCCAGCCTCCTCTCC  
CACCAGAGCCCCAGAGCCAAACAAGTCTCCTCCCTTGACTTTGAGCAAGGAG  
GAGTCTGGGATGTGGGAACCCTTACCTCTGTCTCCCTGGAGCCAGCCCCTGCC  
AGAAACCCAGCTCACCAGAGCGGAAAGCAACCGTCCCAGGAGCAGGAACTGC  
AGCAGCTGGAAATAGAATTATTCCTCAACAGCCTGTCCCAGCCATTTTCTCTGG  
AGGAGCAGGAGCAAATTCTCTCGTGCCTCAGCATCGACAGCCTCTCCCTGTCGG  
ATGACAGTGAGAAGAACCATCAAAGGCCTCTCAAAGCTCGCGGGACACCCTG  
AGCTCAGGCGTACACTCCTGGAGCAGCCAGGCCGAGGCTCGAAGCTCCAGCTG  
GAACATGGTGTCTGGCCCCGGGGGCGGCCACCGACACCCCAAGCTATTTCAATA  
GTGTGAAAGTCAAATACAGTCTCTTAATGGTGAACACCTGCACATCCGGGAG  
TTCCACCGGGTCAAAGTGGGAGACATCGCCACTGGCATCAGCAGCCAGATCCC  
AGCTGCAGCCTTCAGCTTGGTGACCAAAGACGGGCAGCCTGTTTCGCTACGACA  
TGGAGGTGCCAGACTCGGGCATCGACCTGCAGTGCACACTGGCCCCTGATGGC  
AGCTTCGCTGGAGCTGGAGGGTCAAGCATGGCCAGCTGGAGAACAGGCCCTA  
Aaccagcttcatagtactggatatgtgtgttttacagcattatgtagtctgtttttatgcaaaatctaatttaatatattgatatttat  
cattttacgtttctcgttcagcttctgtacaaagtggtagcgttaagctagggggcccgtttaaacccgctgatcagcctcactgtgcct  
tctagttgccagccatctgtgtttgcccctccccctgacctctgacctggaaggtgccactcccactgtcctttcctaataaaatg  
aggaaattgcatcgcatgtctgtagtaggtgtcattctattctggggggtgggggtggggcaggacagcaagggggaggattggga  
agacaatagcaggcatgctggggatgcggtgggctctatggcttctgaggcggaagaaccagctggggctctagggggatccc  
ccacgcgcctgtagcggcgcatlaagcgcggcggtgtgtgtgttacgcgcagcgtgaccgctacactggcagcgccttagc  
gcccgtccttctcttcttcttcttctcttctgcccacgttcgcccgttccccgtcaagctctaaatcgggggctccttttaggggtc  
cgatttagtgccttacggcacctcgaccccaaaaactgattaggggtgatggttcacgtacctagaagttcctattccgaagttcctatt  
ctctagaagtataggaactccttgcccaaaaagcctgaactcaccgcagcgtctgtcgagaagttctgatcgaaaagttcgaca  
gcgtctccgacctgatcagctctcggagggcgaagaatctcgtgcttcagcttcgatgtaggagggcgtggatatgtctcggg  
gtaaatagctgcgccgatggtttctacaaagatcgttatgttatcggcactttgcatcgccgcgctcccattccggaagtgttga  
cattgggggaattcagcgagagcctgacctattgcatctcccgcctgcacaggggtgcacgttgcaagacctgcctgaaaccgaac  
tgcccgtgttctgcagccggtcgcggaggccatggatgcgatcgtcgcggccgatcttagccagacgagcgggttcggcccatt  
cggaccgcaaggaatcggtcaatacactacatggcgtgattcatatgcgcgattgctgatccccatgtgtatcactggcaactgtg  
atggacgacaccgtcagtcgctcgcgcaggctctcgtatgagctgatgctttggggcaggactccccgaagtccggcacc  
ctgtgcacgcggatttcggctccaacaatgtcctgacggacaatggccgcataacagcggctcattgactggagcagggcgtgctt

ggggattccaatacagaggtcgccaacatcttcttctggagccgtgggtggcttgatggagcagcagacgcgctacttcgagcg  
gaggcatccggagcttgaggatcgccgcggctccgggcgtatatgctccgcatggcttgaccaactctatcagagcttggtga  
cggcaatttcgatgatgcagcttgggcgcagggctgatgcagcgaatcgtccgatccggagccgggactgtcgggcgtacaca  
aatcggccgcagaagcgcggccgtctggaccgatggctgtgtagaagtactgccgatagtgaaaccgacgccccagcactcg  
tccgagggcaaaggaatgacgactacgagatttcgattccaccgcccttctatgaaaggtgggcttcggaatcgtttccgg  
gacgcccggctggatgatcctccagcgcggggatctcatgctggagttctcggccaccaactgtttattgcagcttataatggta  
caaataaagcaatagcatcacaaattcacaaataaagcatttttctactgcattctagtgtggttgtccaaactcatcaatgatcttat  
catgtctgtataaccgtcgacctctagctagagcttggcgtaatcatggctatagctgttctctgtgtgaaattgtatccgctcacaattcc  
acacaacatacagaccggaagcataaagttaaagcctgggggtgctaagtagtgagctaactcacattaattgcgttgcgctcact  
gccccgtttccagtcgggaaacctgtcgtccagctgcattaatgaatcgccaacgcgcggggagagggcggttgcgtattggg  
cgctctccgcttctcctcactgactcgtcgcctcggcttccggctgcggcgagcggtatcagctcactcaaggcggtata  
cggttatccacagaatcaggggataacgcaggaagaacatgtgagcaaaaggccagcaaaaggccaggaacctgaaaaagg  
ccgctgtgctggcggttttccataggctccgccccctgacgagcatcacaaaaatcgacgctcaagtcagaggtggcgaaaccg  
acaggactataaagataaccaggcggtttcccctggaagctccctcgtcgcctcctgttccgacctgccgcttaccggatacctgt  
ccgcttttcccttcgggaagcgtggcgctttctcatagctcacgctgtaggtatctcagttcgggtgtaggtcgttcccaagctg  
ggctgtgtgcacgaacccccgttaccggaccgctgcgccttaccggtaactatcgtcttgagccaacccgtaagacacga  
cttaccgactggcagcagccactggtaacaggattagcagagcgaggtatgtaggcggtgtacagagttcttgaagtggggc  
ctaactacggctacactagaagaacagtatttgatctcgcctcgtcgaagccagttaccttcgaaaaagagttgtagctcttga  
tccggcaaaaccaccgctggtagcgggtgggtttttgttgcaagcagcagattacgcgcagaaaaaaggatctcaagaagat  
cctttgatctttctacgggctctgacgctcagtggaacgaaaactcacgttaagggattttggtcatgagattcaaaaaaggatctc  
acctagatccttttaataaaaaatgaagtttaaatcaatctaaagtatatatagtaaaacttggtctgacagttaccaatgcttaacagt  
gaggcacctatctcagcgtatcttatttcgttccatagttgctgactccccgctgtgtagataactacgatacgggagggctta  
ccatctggccccagtgctgcaatgataccgcgagaccacgctcaccggctccagattatcagcaataaaccagccagccggaa  
gggcccagcgcagaagtggtcctgcaactttaccgctccatccagcttataaattgttccgggaagctagagtaagtagttcgc  
agttaatagtttgcgcaacgttgttgcattgctacaggcatcgtgggtgcagctcgtcgtttggtatggcttaccagctccggtcc  
caacgatcaaggcgagttacatgatccccatgttgcaaaaaagcggttagctccttcggctcctccgatcgttgcagaagtaagt  
tggccgcagtggtatcactcatggttatggcagcactgcataattcttactgtcatgccatccgtaagatgcttttctgtgactggtga  
gtactcaaccaagtcattctgagaatagtgatgcggcgaccgagttgctcttggccggcgtcaatacgggataataaccgcgccaca  
tagcagaactttaaagtgtcatcattggaaaacgttctcggggcgaaaactctcaaggatcttaccgctgttgagatccagttcga  
tgaacccactcgtgacccaactgatcttcagatcttttaccagcgtttctgggtgagcaaaaaacaggaaggcaaaatgcc  
gcaaaaaagggaataaggcgacacggaaatgtgaactcactcttcttttcaatattattgaagcatttatcagggttattgtc  
tcatgagcggatacatattgaatgatattgaaaaataaacaataaggggtccgcgcacatttccccgaaaagtgccacctgacgt  
c

pCS2-6myc-GW (FKBP8 N terminal)

ggccgcttgctggcgTTTTCCataggctccgccccctgacgagcatcacaaaaatcgacgctcaagtcagaggtggcgaaacc  
cgacaggactataaagataccaggcgTTTCCCCTGgaagctccctcgtgcgctctcctgtccgacctgccgcttaccggatacct  
gtccgctTTTcctcctcggaagcgtggcgctTTTcctatagctcacgctgtaggtatctcagttcgggtgtaggtcgttcgctccaagct  
gggctgtgtgcacgaacccccgtcagcccagccgtcgccttatccggtaactatcgtcttgagccaaccggtaagacacg  
acttatcggcactggcagcagccactggtaacaggattagcagagcgaggtatgtaggcgggtctacagagttctgaagtgggtg  
cctaactacggctacactagaaggacagtatttggatctcgcctcgtgaagccagttaccttcggaaaaagagttggtagctcttg  
atccggcaaaaccaccgctggtagcgggtgTTTTTgttgcaagcagcagattacgcgcagaaaaaaggatctcaagaag  
atcctttgatctTTTctacggggtctgacgctcagtggaacgaaaatcacgttaagggatttggcatgagattataaaaaggatctt  
cacctagatcTTTTaaataaaaatgaagTTTTaaatcaatctaaagtatatatgagtaaactggctgacagttaccaatgcttaacg  
tgaggcacctatctcagcagctgtctatttctcatccatagttgcctgactccccgctgtagataactacgatacgggaggggctt  
accatctggccccagtgctgcaatgataccgcgagaccacgctcaccggctccagattatcagcaataaaccagccagccgga  
agggccgagcgcagaagtggctcctgcaactttatccgctccatccagcttattaattgttggccgggaagctagagtaagtagttcgc  
cagttaatagtttgcgaacgTTTgttccattgctacaggcatcgtgggtgcacgctcgtcgttggtagtggcttaccagctccggctc  
ccaacgatcaaggcgagttacatgatccccatgTTTgtgcaaaaaagcggtagctcctcggctcctccgacgTTTgtcagaagtaag  
ttggccgcaagtgttatcactcatggttatggcagcactgcataattcttactgtcatgccatccgtaagatgctTTTctgtactgggtga  
gtactcaaccaagtcattctgagaatagtgtagcggcgaccgagttgctcttggccggcgtcaatacgggataataccgcgccaca  
tagcagaactTaaaagtgtcatcattggaaaacgTTTctcggggcgaaaactctcaaggatcttaccgctgttgagatccagttcga  
tgtaaccactcgtgcaccaactgatcttcagatctTTTactttaccagcgtTTTctgggtgagcaaaaaacaggaaggcaaaaatgccc  
gcaaaaaagggaaataagggcgacacggaaatgtgaatactcactcttctTTTcaatattattgaagcatttatcagggttattgtc  
tcatgagcggatacatatttgaatgtatttagaaaaataaacaataaggggttccgcgcacattccccgaaaagtgccacctaaattg  
taagcgttaattttgtTaaaatcgcgtTaaaatTTTgtTaaatcagctcattTTTaaaccaataggccgaaatcgcaaaaatccctataa  
atcaaaagaatagaccgagataggggtgagtgTTTcagTTTggaacaagagtcactatTaaagaacgtggactccaacgtcaa  
agggcgaaaaaccgtctatcaggcgatggccactacgtgaaccatcacctaatcaagTTTTggggcgtgaggtgccgtaaag  
cactaaatcggaaacctaaagggagccccgatttagagcttgacggggaaagccggcgaaacgtggcgagaaaggaaaggaa  
gaaagcgaaaggagcggggcgtagggcgctggcaagtgtagcggtcacgctcgcgtaaccaccacaccgccgccttaattg  
cgccgctacagggcgctccattcgcattcaggctcgcgaactgtTgggaagggcgatcgggtcggggcctcttcgctattacgc  
cagtcgaccatagccaattcaatatggcgtatatggactcatgccaattcaatatgggtggatctggacctgtgccaattcaatatggcg  
tatatggactcgtgccaattcaatatgggtggatctggacccagccaattcaatatggcggacttggcaccatgccaattcaatatggc  
ggacttggcactgtgccaactggggaggggtctacttggcacggtgccaagTTTtagagggggtcttggccctgtgccaagtccg  
ccatattgaattggcatggtgccaataatggcggccatattggctatatgccaggatcaatatagggcaatatccaatatggcctat  
gccaatatggctattggccaggtcaatactatgtattggcctatgccatagattccatatatgggTTTTctattgacgtagatagc  
cctcccaatggcggtccatataccatataatggggcttccataaccgccatagccactccccattgacgtcaatggctctata  
tatggctTTTcctattgacgtcatatggcggtcctattgacgtatatggcgctccccattgacgtcaattacggtaaattggcccccc  
tggtcaatgccattgacgtcaataggaccaccaccattgacgtcaatgggatggctcattgccattcatatccgttctcagccc  
cctattgacgtcaatgacggTaaatggccacttggcagtagatcaatacttattaatgtaacttggcaagtagactatttgaagg  
acgccagggtagacttggcagtagtactccattgacgtcaatggcggtTaaatggcccgcgatggctgccaagtagactccccattgacgt  
caatggggaggggcaatgacgcaaatggcggtccattgacgtTaaatggcggttagggcgtcctaattgggaggtctatataagca  
atgctcgttagggaaaccgcttctgctggggacgtcggagcaagcttgatttaggtgacactatagaatacaagctacttgtctt  
ttcaggatcccatcgattTaaagctatggagcaaaagctcatttctgaagaggacttgaatgaaatggagcaaaagctcatttctgaa  
gaggactgaaatgaaatggagcaaaagctcatttctgaagaggacttgaatgaaatggagcaaaagctcatttctgaagaggactg  
aatgaaatggagcaaaagctcatttctgaagaggacttgaatgaaatggagagcttggcgacctcacatggagcaaaagctcat  
tctgaagaggacttgaattcaagatcacaagTTTgtcaaaaaagcaggctccATGGCATCGTGTGCTGAACC

CTCTGAGCCCTCTGCCCCACTGCCCGCCGGGGTCCCACCGCTCGAGGACTTCGA  
GGTACTGGATGGGGTTGAGGATGCAGAGGGTGAGGAGGAAGAGGAGGAGGAA  
GAGGAGGAAGAGGATGACCTGAGTGAGCTGCCACCGCTGGAGGACATGGGAC  
AACCCCGGCGGAGGAGGCTGAGCAGCCTGGGGCCCTGGCCCCGAGAGTTCCTT  
GCTGCCATGGAGCCCGAGCCCGCCCCAGCCCCGGCCCCAGAAGAGTGGCTGGA  
CATTCTGGGGAACGGGCTGTTGAGGAAGAAGACGCTGGTCCCAGGGCCGCCAG  
GTTTCGAGCCGCCCGGTCAAGGGCCAGGTGGTCACCGTACATCTGCAGACGTCG  
CTGGAGAATGGCACACGGGTGCAGGAGGAGCCGGAGCTGGTGTTCACTCTGGG  
TGACTGTGACGTCATCCAGGCCCTGGATCTCAGTGTCCCCTCATGGACGTGGG  
GGAGACGGCCATGGTCACTGCTGACTCCAAGTACTGCTACGGCCCCCAAGGCA  
GCAGGAGCCATACATCCCCCGCACGCGGCCCTGTGCCTGGAGGTGACCCTG  
AAGACGGCTGTGGACGGGCCTGACCTGGAGATGCTCACGGGGCAGGAGCGCGT  
GGCCCTGGCCAACCGGAAGCGGGAGTGCGGCAACGCCCACTACCAGCGGGCG  
GACTTCGTCTGGCCGCAACTCCTACGACCTCGCCATCAAGGCTATCACCTCC  
AGCGCCAAAGTGGACATGACGTTTCGAGGAGGAGGCACAGCTCCTGCAGTTGAA  
GGTGAAGTGTCTGAACAACCTGGCGGCCTCGCAGCTGAAGCTCGACCACTACC  
GCGCAGCCCTGCGCTCCTGCAGCCTTGTGCTGGAGCACCAGCCAGACAACATC  
AAGGCTCTCTTCCGCAAGGGCAAGGTGCTGGCCCAGCAGGGGGAGTACAGTGA  
GGCCATCCCCATCCTGAGGGCAGCCCTGAAGCTGGAACCTTCCAACAAGACGA  
TCCACGCAGAGCTCTCAAAGCTGGTGAAGAAGCATGCGGCGCAGCGGAGCACG  
GAGACCGCCTTGTACCGGAAAATGCTGGGCAACCCAGCCGGCTGCCTGCTAA  
GTGCCCTGGCAAGGGTGCCTGGTCCATCCCATGGAAGTGGCTGTTTGGGGCGA  
CTGCTGTTGCCCTTGGGGGGTGTGGCACTCTCTGTGGTCATCGCTGCCAGGA  
ACTGAaccagctttctgtacaaagtggatcctctcagcctctagaactatagtagtcgtattacgtagatccagacatgataaga  
tacattgatgagtttgacaaaccacaactagaatgcagtgaaaaaatgctttattgtgaaattgtgatgctattgctttattgtaac  
attataagctgcaataaacaagttaacaacaacaattgcaatcattttatgtttcaggttcagggggaggtgtgggaggtttttaattcg  
cggccgcggcgccaatgcattgggcccgtaccagctttgtcccttagtgagggttaattgcgcgctggcgtaatcatggta  
tagctgttctgtgtgaaattgttatccgctcacaattccacacaacatacagccggaagcataaagttaaagcctggggtgccta  
atgagtgagtaactacattaattgcgttgcgctcactgccgcttccagtcgggaaacctgtcgtgccagctgcattaatgaatcg  
gccaacgcgcgggagagggcgtttgcgtattggcgctcttccgcttctcgtcactgactcgtgcgctcggtcgttcggctgc  
ggcgagcggatcagctcactcaaaggcgtaatacggttatccagaatcaggggataacgcaggaaagaacatgtgagcaa  
aaggccagcaaaaggccaggaaccgtaaaaa



pCS2-6myc-GW (FBXW7 N terminal)

cctctcgagcctctagaactatagtgagtcgtattacgtagatccagacatgataagatacattgatgagtttgacaaaccacaacta  
gaatgcagtgaaaaaatgctttattgtgaaatttgatgctattgctttattgtaaccattataagctgcaataaacaagftaacaaca  
acaattgcattcattttatgttcaggttcagggggaggtgtgggaggttttaattcgcggccgcggcgccaatgcattgggcccgg  
taccagcttttgccttttagtgagggtaattgcgcgcttggcgtaatcatggcatagctgttctgtgaaattgttatccgctca  
caattccacacaacatacgagccggaagcataaagttaaagcctgggggtcctaagtagtgagctaactcacattaattgcgttgc  
gctactgcccgtttccagtcgggaaacctgtcgtgccagctgcattaatgaatcggccaacgcgcggggagagggcgtttgctg  
attgggcgctctccgctctcgcactgactcgtcgcgtcggctgttcggctgcggcgagcgggtatcagctcactcaaaggcg  
gtaatacggttatccacagaatcaggggataacgcaggaaagaacatgtgagcaaaaagccagcaaaaagccaggaaccgtaa  
aaaggccgcgttgctggcgttttccataggctccgccccctgacgagcatcacaataatcagcgtcaagtcagaggtggcgaa  
acccgacaggactataagataaccaggcgtttccccctggaagctccctcgtcgcgtctcctgttccgacctgccgttaccggat  
acctgtccgcttttccctcgggaagcgtggcgttttccatagctcacgctgtaggtatctcagttcggtgtaggtcgtcgtcca  
agctgggctgtgtgcacgaacccccgttccagcccagcctgcgccttatccgtaactatcgtcttgagtcacaaccggtaaga  
cacgacttatcgccactggcagcagccactggtaacaggattagcagagcgaggtatgtaggcgggtctacagagttctgaagt  
gtggcctaactacggctacactagaaggacagtatttggtatctcgcgtctgtgaagccagttaccttggaaaaagagttgtagc  
tcttgatccggcaaaaccaccgctggtagcgggtgtttttgttgaagcagcagattacgcgcagaaaaaaggatctcaag  
aagatcctttgatctttctacggggtctgacgctcagtggaacgaaaactcacgtaagggttttggtcatgagattacaaaaagg  
atcttcacctagatcctttaaataaaaatgaagttaaatcaatctaaagtatatagtaaaacttggtctgacagttaccaatgctta  
atcagtgaggcacctatctcagcgatctgtctatttgcctatccatagttgctgactccccgtcgtgtagataactacgatacgggag  
ggcttaccatctggccccagtgctgcaatgataccgcgagaccacgctcaccggctccagattatcagcaataaaccagccagc  
cgggaagggccgagcgcagaagtgtctgcaactttatccgctccatccagctattaattgttgcgggaagctagagtaagtag  
ttegccagtaataagttgcaaacggttggccattgctacagcactcgtgggtgcacgctcgtcgtttggtatggcttcaatcagctcc  
ggttcccaacgatcaaggcgagttacatgatccccatgttgtgcaaaaaagcggttagctcctcggctcctccgatcgttgcagaa  
gtaagttggccgagtggtatcactcatggttatggcagcactgcataattcttactgtcatgccatccgtaagatgcttttctgtgact  
ggtagtactcaaccaagtcattctgagaatagtgatgcggcgaccgagttgctcttgcggcgcaatacgggataataccgcg  
ccacatagcagaactttaaagtgtcatcattggaaaacgttctcggggcgaaaactctcaaggatcttaccgctgttgagatcca  
gttcgatgtaaccactcgtgcaccaactgatcttcagcatcttttaccagcgtttctgggtgagcaaaaacaggaaggcaa  
aatgccgcaaaaaagggaataaggcgacacggaaatgtgaatactcactcttcttttcaatattattgaagcatttatcagggt  
tattgtctcatgagcggatacatattgaatgtatttagaaaaataaacaataaggggtccgcgcacattccccgaaaagtccacct  
aaattgtaagegtaataattttgtaaaattcgcgttaaattttgtaaatcagctcatttttaaccaataggccgaaatcggcaaaatccc  
ttataatcaaaaagaatagaccgagataggggtgagtggttccagtttggaaacaagagtcactattaagaacgtggactccaac  
gtcaaaagggcgaaaaaccgtctatcagggcgatggcccactacgtgaaccatcacctaatacaagtttttggggctgaggtgccgt  
aaagcactaaatcgaaccctaaaggagccccgatttagactgacggggaaagccggcgaacgtggcgagaaggaag  
ggaagaaagcgaaggagcgggcgctagggcgctgcaagtgtagcggtaacgctgcgcgtaaccaccacaccgcccgcgt  
taatgcgccgtacagggcgctccattcgcattcaggctgcgcaactgttgggaagggcgatcgggtcgggcctcttcgctat  
tacgccagtcgaccatagccaattcaatattggcgtatattggactcatccaattcaatattggtggatctggacctgtccaattcaat  
ggcgtatattggactcgtccaattcaatattggtggatctggacccagccaattcaatattggcggacttggcaccatccaattcaat  
atggcggacttggcactgtccaactggggaggggtcacttggcacgggtccaagttttagggaggggtcttggccctgtgcaa  
gtccgccatattgaattggcatggtccaataatggcggccatattggctatattgccagatcaatatataggcaatatccaataggc  
cctatccaatatggctattggcaggtcaatactatgtattggccctatccatatagtattccatataatgggttttctattgacgtaga  
tagccccccaatggggcggtccatataccatataatggggcttctaataccgccatagccactccccattgacgtcaatggct  
ctatataatggcttcttattgacgtcatatggcggtcctattgacgtatattggcctccccattgacgtcaattacggtaaatggc  
cgctggctcaatgccattgacgtcaataggaccaccaccattgacgtcaatgggatggctcattgccattcatatccgttctcac

gccccattgacgtcaatgacggtaaatggcccacttggcagtacatcaatatctattaatagtaacttgccaagtacattactattgg  
aaggacgccagggtacattggcagtactcccattgacgtcaatggcggtaaatggcccgcgatggctgccaagtacatccccattg  
acgtcaatggggaggggcaatgacgcaaatggcggtccattgacgtaaatggcggttagcgtgcctaattggaggtctatata  
agcaatgctcgttagggaaccgccattctgcctggggacgtcggagcaagcttgatttaggtgacactatagaatacaagctactg  
ttcttttgcaggatcccacgatttaaagctatggagcaaaagctcatttctgaagaggacttgaatgaaatggagcaaaagctcattt  
ctgaagaggacttgaatgaaatggagcaaaagctcatttctgaagaggacttgaatgaaatggagcaaaagctcatttctgaagagg  
acttgaatgaaatggagcaaaagctcatttctgaagaggacttgaatgaaatggagagcttggcgacccaccatggagcaaaag  
ctcatttctgaagaggacttgaatcaaggatcacaagttgtacaaaaagcaggctccATGAATCAGGAACTGCT  
CTCTGTGGGCAGCAAAAGACGACGAAGTGGAGGCTCTCTGAGAGGTAACCCCTT  
CCTCAAGCCAGGTAGATGAAGAACAGATGAATCGTGTGGTAGAGGAGGAACA  
GCAACAGCAACTCAGACAACAAGAGGAGGAGCACACTGCAAGGAATGGTGAA  
GTTGTTGGAGTAGAACCTAGACCTGGAGGCCAAAATGATTCCCAGCAAGGACA  
GTTGGAAGAAAACAATAATAGATTTATTTTCGGTAGATGAGGACTCCTCAGGAA  
ACCAAGAAGAACAAGAGGAAGATGAAGAACATGCTGGTGAACAAGATGAGGA  
GGATGAGGAGGAGGAGGAGATGGACCAGGAGAGTGACGATTTTGATCAGTCT  
GATGATAGTAGCAGAGAAGATGAACATAACATACTAACAGTGTACGAACTC  
CAGTAGTATTGTGGACCTGCCCGTTCACCAACTCTCCTCCCATTCTATACAAA  
AACAAACAAAATGAAAAGAAAGTTGGACCATGGTTCTGAGGTCCGCTCTTTTT  
CTTTGGGAAAGAAACCATGCAAAGTCTCAGAATATACAAGTACCACTGGGCTT  
GTACCATGTTTCAGCAACACCAACAACCTTTTGGGGACCTCAGAGCAGCCAATGG  
CCAAGGGCAACAACGACGCCGAATTACATCTGTCCAGCCACCTACAGGCCTCC  
AGGAATGGCTAAAAATGTTTCAGAGCTGGAGTGGACCAGAGAAATTGCTTGCT  
TTAGATGAACTCATTGATAGTTGTGAACCAACACAAGTAAAACATATGATGCA  
AGTGATAGAACCCAGTTTCAACGAGACTTCATTTCAATTGCTCCCTAAAGAGTT  
GGCACTCTATGTGCTTTCATTCCTGGAACCCAAAGACCTGCTACAAGCAGCTCA  
GACATGTCGCTACTGGAGAATTTTGGCTGAAGACAACCTTCTCTGGAGAGAGA  
AATGCAAAGAAGAGGGGATTGATGAACCATTGCACATCAAGAGAAGAAAAGT  
AATAAAACCAGTTTCATACACAGTCCATGGAAAAGTGCATACATCAGACAGC  
ACAGAATTGATACTAACTGGAGGCGAGGAGAACTCAAATCTCCTAAGGTGCTG  
AAAGGACATGATGATCATGTGATCACATGCTTACAGTTTTGTGGTAACCGAATA  
GTTAGTGGTTCTGATGACAACACTTTAAAAGTTTGGTCAGCAGTCACAGGCAA  
ATGTCTGAGAACATTAGTGGGACATACAGGTGGAGTATGGTCATCACAAATGA  
GAGACAACATCATCATTAGTGGATCTACAGATCGGACACTCAAAGTGTGGAAT  
GCAGAGACTGGAGAATGTATACACACCTTATATGGGCATACTTCCACTGTGCGT  
TGTATGCATCTTCATGAAAAAGAGTTGTTAGCGGTTCTCGAGATGCCACTCTT  
AGGGTTTGGGATATTGAGACAGGCCAGTGTTTACATGTTTTGATGGGTCATGTT  
GCAGCAGTCCGCTGTGTTCAATATGATGGCAGGAGGGTTGTTAGTGGAGCATA  
TGATTTTATGGTAAAGGTGTGGGATCCAGAGACTGAAACCTGTCTACACACGTT  
GCAGGGGCATACTAATAGAGTCTATTCATTACAGTTTGATGGTATCCATGTGGT  
GAGTGGATCTCTTGATACATCAATCCGTGTTTGGGATGTGGAGACAGGGAATT  
GCATTCACACGTTAACAGGGCACCAAGTCGTTAACAAGTGGAAATGGAACCTCAA  
GACAATATTCTTGTCTCTGGGAATGCAGATTCTACAGTTAAAATCTGGGATATC  
AAAACAGGACAGTGTTTACAAACATTGCAAGGTCCCAACAAGCATCAGAGTGC

TGTGACCTGTTTACAGTTCAACAAGAACTTTGTAATTACCAGCTCAGATGATGG  
AACTGTAAAACCTATGGGACTTGAAAACGGGTGAATTTATTCGAAACCTAGTCA  
CATTGGAGAGTGGGGGGAGTGGGGGAGTTGTGTGGCGGATCAGAGCCTCAAAC  
ACAAAGCTGGTGTGTGCAGTTGGGAGTCGGAATGGGACTGAAGAAACCAAGCT  
GCTGGTGCTGGACTTTGATGTGGACATGAAGTGAaccagctttctgtacaaagtggat
